# Supplementary material for: The causal effect of screen uses versus reading on the brain development in early adolescents
Source: Research Square preprint supplement (doi:10.21203/rs.3.rs-3032482/v1), 2023-06-20
Supplement: Supplementary file 1 [file 947eb41d968491b7daf3bfeb.xlsx]

## Sheet: STable1
Supplementary Table 1. the association between screen use or reading and children's cognitive or behavioral performance
			TVM			Video			Game			Text			SNS			VC			Reading
			β	se	p	b	se	p	b	se	p	b	se	p	b	se	p	b	se	p	b	se	p
Baseline	Cognition	picture vocabulary	-1.07316	0.187479	1.08325e-08	-0.759265	0.171909	1.01772e-05	-0.599145	0.184505	0.00117063	-2.19756	0.447458	9.26122e-07	-4.2753	0.592431	5.90753e-13	-3.18359	0.491404	9.90342e-11	6.25446	0.270372	4.71391e-114
		flanker	-0.381709	0.166403	0.0218271	-0.102272	0.15249	0.502445	-0.195779	0.163545	0.231311	0.220586	0.39705	0.578529	0.310123	0.526757	0.556055	-0.801593	0.436513	0.0663488	1.21102	0.248243	1.09386e-06
		pattern comparison	-0.835747	0.266974	0.00175277	-0.926179	0.244485	0.000152991	-0.324145	0.262474	0.216886	-1.29291	0.637054	0.0424441	-2.82544	0.844732	0.000827911	-1.94141	0.700346	0.00558505	1.82873	0.398488	4.52933e-06
		picture sequence memory	-0.447041	0.193773	0.0210828	-0.816194	0.177304	4.23249e-06	-0.605298	0.190325	0.00147763	-1.39852	0.462061	0.00248166	-3.35847	0.612074	4.23395e-08	-2.43055	0.507591	1.71652e-06	1.97615	0.288592	8.1644e-12
		oral reading recognition	-1.48451	0.229443	1.04722e-10	-1.1865	0.211475	2.0951e-08	-0.491266	0.226049	0.0297936	-0.859359	0.548841	0.117449	-2.17424	0.727794	0.00282317	-2.35006	0.602562	9.7067e-05	7.67613	0.330047	3.19984e-115
	Behavior	anxious/depressed	0.200124	0.0750371	0.00767126	0.286495	0.0686875	3.07022e-05	0.29049	0.0736824	8.14528e-05	0.263882	0.179044	0.140571	0.332463	0.237538	0.161672	0.217718	0.196897	0.268876	0.0219005	0.112151	0.845182
		withdrawn/depressed	0.214462	0.0690775	0.0019128	0.3049	0.0632169	1.44413e-06	0.190736	0.0678808	0.0049703	-0.0608726	0.164879	0.711993	0.0833871	0.218742	0.703057	-0.236914	0.181286	0.191307	0.0770496	0.103259	0.455584
		somatic complaints	0.344015	0.0747966	4.31462e-06	0.432701	0.068425	2.71421e-10	0.235851	0.0735496	0.0013489	0.207519	0.178664	0.245476	0.726102	0.236891	0.00218417	0.288673	0.196454	0.141765	-0.154722	0.111891	0.166773
		social problems	0.39439	0.0558384	1.78954e-12	0.323279	0.0511888	2.86324e-10	0.383436	0.0548682	3.04486e-12	0.308063	0.133619	0.0211663	0.310569	0.177298	0.0798744	0.335908	0.146933	0.0222771	-0.119216	0.0837041	0.154418
		thought problems	0.468239	0.0725969	1.19601e-10	0.472941	0.0664601	1.22266e-12	0.420031	0.0713662	4.15416e-09	0.508188	0.173576	0.00342538	0.517778	0.230339	0.0246142	0.353189	0.190942	0.0643967	0.216843	0.108745	0.0461865
		attention problems	0.425236	0.0753575	1.73893e-08	0.468929	0.0689605	1.13483e-11	0.5408	0.0739263	2.859e-13	0.208211	0.180143	0.2478	0.239801	0.238999	0.315725	0.302757	0.198078	0.126441	-0.419567	0.112719	0.000199051
		rule-breaking behavior	0.385536	0.0565749	1.02584e-11	0.333263	0.0518456	1.38013e-10	0.346108	0.0556188	5.17015e-10	0.269461	0.135361	0.0465547	0.729517	0.179416	4.83501e-05	0.413311	0.148807	0.0054929	-0.20308	0.084764	0.0166098
		aggressive behavior	0.370681	0.0650027	1.22948e-08	0.317697	0.0595644	9.93336e-08	0.368828	0.0638645	8.02542e-09	0.0846273	0.155409	0.586085	0.611618	0.206051	0.00300504	0.235126	0.170874	0.168861	-0.311639	0.0972606	0.00136075
2-year follow-up	Cognition	picture vocabulary	-1.09353	0.21529	3.96932e-07	-0.243937	0.197965	0.217941	-0.675919	0.141652	1.89553e-06	-0.92743	0.318914	0.00365744	-1.30658	0.30178	1.53235e-05	-2.10587	0.399612	1.4416e-07	11.0929	0.70885	1.52169e-53
		flanker	-0.0948886	0.160922	0.555455	-0.368932	0.147389	0.0123522	-0.292131	0.105737	0.00575839	-0.612678	0.237642	0.00997029	-0.460128	0.22525	0.0411464	-0.595734	0.298631	0.0461264	2.4644	0.543297	5.9096e-06
		pattern comparison	-0.430088	0.246878	0.0815699	-0.186773	0.226362	0.409361	-0.1488	0.162418	0.359643	-0.0668398	0.365022	0.85472	0.384056	0.345821	0.266827	0.255138	0.458525	0.577948	3.16492	0.834465	0.000151302
		picture sequence memory	-0.740283	0.181382	4.56925e-05	-0.373695	0.16651	0.0248717	-0.391409	0.119387	0.00105299	-1.19915	0.26796	7.86001e-06	-1.33222	0.253654	1.58606e-07	-0.67895	0.337314	0.0442046	3.57055	0.612612	6.06065e-09
		oral reading recognition	-1.15543	0.23053	5.63054e-07	-0.605199	0.211776	0.00428993	-0.714418	0.151678	2.56434e-06	-0.543966	0.341724	0.111507	-0.650741	0.323736	0.044491	-1.45809	0.428768	0.000679201	10.2572	0.765126	4.47163e-40
	Behavior	Anxious/depressed	-0.0133149	0.0663748	0.841021	0.108552	0.0608152	0.0743498	0.0295279	0.0436523	0.498806	0.00275618	0.0981008	0.977588	0.0622779	0.0929496	0.502887	-0.0541239	0.123231	0.660538	0.54863	0.224511	0.0145838
		Withdrawn/depressed	0.10239	0.0665702	0.124114	0.26372	0.0608888	1.52139e-05	0.101625	0.0437659	0.0202851	0.0532505	0.0984158	0.588487	0.139805	0.0932297	0.133808	-0.215038	0.123586	0.081942	0.0920244	0.225411	0.683113
		somatic complaints	0.315806	0.0676746	3.1686e-06	0.212217	0.0621134	0.000640718	0.106636	0.044603	0.0168606	0.110777	0.10029	0.269419	0.0870415	0.0950343	0.35978	0.100396	0.125994	0.425601	-0.463633	0.229615	0.0435389
		social problems	0.236269	0.05085	3.49225e-06	0.154004	0.0466751	0.00097753	0.0474448	0.0335297	0.157148	0.0157775	0.0753669	0.834192	0.0860869	0.0714004	0.228011	0.0234617	0.0946757	0.804294	0.0116229	0.172618	0.94632
		thought problems	0.299688	0.0647999	3.87381e-06	0.182657	0.0594894	0.00215273	0.114241	0.0426981	0.00749245	0.0613773	0.0960354	0.522789	0.091663	0.0909908	0.313812	-0.0235856	0.120646	0.845016	0.452378	0.219846	0.0396861
		attention problems	0.304301	0.0643135	2.30934e-06	0.313897	0.0589047	1.04549e-07	0.240333	0.0422441	1.37301e-08	0.158853	0.0952974	0.0956127	0.19922	0.090274	0.027385	0.211114	0.119708	0.077883	-0.617831	0.218116	0.00464166
		rule-breaking behavior	0.292801	0.0467375	4.14857e-10	0.183485	0.0429575	1.99074e-05	0.14218	0.0308111	4.06881e-06	0.259989	0.0693034	0.000178428	0.424213	0.0654299	1.01133e-10	0.337468	0.0870482	0.000107625	-0.474589	0.158837	0.00282685
		aggressive behavior	0.288931	0.0546577	1.31904e-07	0.156632	0.0502192	0.00182851	0.179077	0.0359631	6.6589e-07	0.179465	0.0810259	0.026825	0.305625	0.0766656	6.83216e-05	0.271109	0.101756	0.007747	-0.3343	0.185619	0.0717815
Notes. β indicates the coefficient in the linear mixed-effects model, se is the standard error of the corresponding coefficient, p indicates significance, and the p-values that survived the Bonferroni correction (uncorrected p < 0.05/13) are bolded
Abbreviation. TVM = watching television shows/ movies; Video: watching videos; Game = playing video games; Text = texting on a cell phone, tablet and so on; SNS = visiting social networking sites; VC = video chatting.

## Sheet: STable2
Supplementary Table 2. the association between screen use or reading and children's brain volume in 148 cortical areas and 12 subcortical areas at two time points
Brain area	Baseline																						2-year follow-up
	TVM			Video			Game			Text			SNS			VC			Reading				TVM			Video			Game			Text			SNS			VC			Reading
	β	se	p	β	se	p	β	se	p	β	se	p	β	se	p	β	se	p	β	se	p		β	se	p	β	se	p	β	se	p	β	se	p	β	se	p	β	se	p	β	se	p
left fronto-marginal gyrus and sulcus	-8.49944	4.66512	0.068512	-10.5389	4.27328	0.0136788	-6.45312	4.5871	0.159534	0.244998	11.2107	0.982565	-10.736	14.8068	0.468431	-3.67568	12.23	0.76377	14.2448	6.95919	0.0407054		-0.792793	4.28185	0.85312	-6.33976	3.94492	0.108123	-3.68713	2.81588	0.190477	-14.2173	6.32255	0.0245915	-3.4657	6.02516	0.565187	-6.44782	7.93034	0.416236	38.0162	14.4568	0.00858226
left inferior occipital gyrus and sulcus	-20.8422	8.54406	0.0147379	-18.8306	7.8281	0.016176	-18.3288	8.40109	0.0291646	17.9954	20.535	0.380883	13.7376	27.1241	0.612542	-20.9302	22.402	0.350182	10.1087	12.7514	0.427951		-17.0127	7.86165	0.0305262	-12.0656	7.2473	0.0960269	0.266724	5.17441	0.958893	-16.7934	11.6201	0.148485	-7.25305	11.0691	0.512344	-2.1982	14.5706	0.88009	57.164	26.5676	0.0314886
left paracentral lobule and sulcus	-9.19949	6.09504	0.131258	-0.199453	5.61647	0.971672	-0.013018	6.01223	0.998272	-24.0313	14.622	0.100325	-9.69857	19.2633	0.614647	-20.6852	15.9685	0.195235	-6.93715	9.0679	0.444285		-9.28969	5.59438	0.0968888	-4.19638	5.15733	0.415884	-0.24317	3.6812	0.947336	2.16148	8.26902	0.793802	-3.79874	7.87501	0.629565	-3.18877	10.3658	0.758385	28.748	18.9066	0.128462
left subcentral gyrus and sulci	-12.2409	7.63706	0.109018	-3.52148	6.99821	0.614842	-6.35075	7.50963	0.397761	5.8445	18.3515	0.750134	4.44613	24.2391	0.854468	-32.8481	20.0163	0.100829	59.2503	11.3728	1.94587e-07		-16.7204	7.00441	0.0170297	-2.44386	6.46015	0.70523	-11.0229	4.60733	0.0167842	-5.44515	10.3569	0.599092	2.36184	9.86391	0.810775	-2.53838	12.9835	0.845006	88.6035	23.6445	0.000181408
left transverse frontopolar gyri and sulci	-8.7509	4.37385	0.045461	-4.18933	4.00814	0.295965	-4.28591	4.30123	0.319073	-14.6866	10.5098	0.162335	-11.7726	13.8828	0.396471	5.26925	11.4669	0.645876	21.848	6.52165	0.000812308		-9.00942	3.99147	0.0240544	-9.42465	3.67792	0.0104307	-2.28123	2.627	0.385243	-9.65576	5.89956	0.101778	-6.13995	5.61967	0.274647	-3.02099	7.39795	0.683036	31.7457	13.4879	0.0186411
left anterior part of the cingulate gyrus and sulcus	-23.1973	8.96271	0.00966831	-15.0717	8.21358	0.0665531	-2.53357	8.81624	0.773833	-22.1215	21.5419	0.304503	33.1167	28.4524	0.244492	1.2103	23.5025	0.958931	55.41	13.3607	3.40604e-05		-22.076	8.36267	0.00832883	-11.4979	7.71205	0.136071	-1.06862	5.50581	0.846116	-21.1197	12.363	0.0876632	-4.78521	11.7785	0.684569	-25.9086	15.4982	0.0946627	91.6607	28.2474	0.00118502
left middle-anterior part of the cingulate gyrus and sulcus	-15.0731	5.99568	0.0119603	-19.4432	5.4907	0.000401091	-9.58934	5.89642	0.103933	-0.520064	14.4114	0.971214	21.2534	19.0331	0.264181	0.558172	15.7217	0.971679	24.391	8.94389	0.0064055		-9.03987	5.57784	0.105171	-9.7395	5.14002	0.0581902	-5.76594	3.66906	0.11615	-1.89293	8.24446	0.818414	1.59336	7.85179	0.839201	-2.61208	10.335	0.800482	59.579	18.8313	0.00156944
left middle-posterior part of the cingulate gyrus and sulcus	-10.5056	5.36123	0.0500896	-11.9337	4.91118	0.0151282	-4.76943	5.27222	0.365692	-8.06973	12.8837	0.531105	10.0351	17.0171	0.555407	-8.08539	14.0552	0.565135	39.5919	7.986	7.30697e-07		-14.2709	4.82745	0.0031339	-5.39408	4.45335	0.225879	-5.24657	3.17791	0.0988319	2.09768	7.14103	0.768965	4.40432	6.80062	0.51726	-9.68285	8.9505	0.2794	48.1334	16.3138	0.00319242
left posterior-dorsal part of the cingulate gyrus	-9.84193	4.39041	0.0250136	-7.69096	4.02286	0.0559423	-6.58621	4.31742	0.127182	-23.2962	10.5481	0.0272383	-1.95772	13.9371	0.888294	-32.4675	11.5046	0.00478438	19.4824	6.54797	0.00293696		-11.7681	3.96578	0.00302207	-5.39008	3.65815	0.140714	-4.25733	2.61071	0.103034	0.461989	5.86651	0.937236	1.0177	5.58708	0.855472	2.06448	7.35401	0.778934	37.2858	13.4037	0.00543351
left posterior-ventral part of the cingulate gyrus	-3.24294	2.15174	0.131826	0.990393	1.9717	0.615471	-1.40932	2.11583	0.505383	-4.00109	5.17022	0.439033	-1.07883	6.82923	0.874483	-4.91015	5.64026	0.384029	-2.02581	3.21051	0.528066		1.40129	1.92808	0.467407	-0.612966	1.77706	0.730164	1.64237	1.26806	0.195335	-2.56617	2.84877	0.367753	-1.14821	2.71331	0.672191	-3.50661	3.57106	0.326186	7.37771	6.51505	0.257534
left cuneus	-11.1245	7.12483	0.118484	-8.3966	6.56619	0.201024	-12.9835	7.02751	0.0647147	-27.1623	17.0894	0.112011	13.373	22.5114	0.552496	-38.1599	18.6608	0.0409008	-2.27139	10.5977	0.830298		-20.2341	6.4332	0.00167227	-6.3339	5.96941	0.288731	-10.7518	4.25845	0.0116169	-18.7919	9.51942	0.0484472	-8.56016	9.07723	0.345723	-40.2407	11.9985	0.000804897	20.8562	21.7713	0.338139
left opercular part of the inferior frontal gyrus	-6.28208	8.69313	0.469921	-9.01096	7.96414	0.257909	-14.5637	8.54542	0.0883768	-18.2036	20.885	0.383451	19.9533	27.5858	0.469509	10.726	22.7849	0.637833	25.3112	12.9657	0.0509587		-9.74126	8.00662	0.223813	-6.11181	7.37986	0.407624	-3.64394	5.26728	0.489101	-0.464645	11.8327	0.968679	14.8905	11.2665	0.186359	-3.00566	14.833	0.839432	74.147	27.0358	0.00612523
left orbital part of the inferior frontal gyrus	-5.28901	3.4089	0.120821	-0.607102	3.12375	0.845907	-7.5364	3.35091	0.0245405	-13.4129	8.18975	0.101518	5.06512	10.8191	0.639683	5.24377	8.93594	0.557345	8.04361	5.08551	0.113771		-2.21233	3.15313	0.482953	-2.86478	2.90582	0.324256	-1.11999	2.07412	0.589239	-12.2767	4.65501	0.00839074	-1.3325	4.43731	0.763968	-0.824979	5.84071	0.887683	10.2597	10.655	0.33566
left triangular part of the inferior frontal gyrus	-9.94975	8.86969	0.262	-3.07955	8.12701	0.704753	-4.14741	8.72117	0.634405	-25.282	21.3093	0.235495	-7.20845	28.1486	0.797892	10.1639	23.2489	0.661997	23.8871	13.2303	0.0710419		-15.5765	8.17166	0.0567057	-11.2228	7.53259	0.136335	0.977387	5.37769	0.85579	-20.3117	12.0755	0.0926403	-1.6354	11.5046	0.886967	-24.6929	15.1378	0.10293	50.2674	27.6162	0.0688056
left middle frontal gyrus	-60.5916	23.4165	0.00968645	-34.5471	21.4605	0.107488	-37.9403	23.0294	0.0995071	-112.045	56.2698	0.0464982	-44.141	74.3419	0.552695	-35.9455	61.4024	0.558292	146.844	34.9057	2.62241e-05		-75.4181	21.5641	0.000475245	-30.2412	19.9	0.12868	-21.7773	14.2029	0.125285	-63.0664	31.8974	0.0480959	-18.7091	30.3923	0.538204	-120.452	39.9584	0.0025916	293.188	72.8352	5.80021e-05
left superior frontal gyrus	-97.7525	31.5711	0.00196775	-100.549	28.92	0.00051061	-76.4204	31.0481	0.0138661	-121.461	75.8891	0.109533	7.93183	100.255	0.936942	-111.134	82.794	0.179543	108.705	47.1139	0.021069		-102.33	29.7334	0.000584561	-71.4884	27.4212	0.00916847	-35.8204	19.5799	0.0674109	-57.2576	43.9919	0.19315	22.4394	41.9044	0.592342	-171.9	55.0886	0.00181952	461.448	100.358	4.40441e-06
left long insular gyrus and central sulcus of the insula	-7.23062	2.8022	0.00989121	-5.35074	2.58269	0.0383242	-4.93595	2.76476	0.0742551	-13.1304	6.72296	0.0508531	0.0546076	8.85726	0.995081	-0.851269	7.34398	0.907724	19.3941	4.16293	3.24173e-06		-10.0935	2.56611	8.52677e-05	-2.3484	2.38301	0.324453	-1.91735	1.70115	0.259778	-1.33676	3.8019	0.725156	1.23635	3.62389	0.732997	-4.76243	4.77622	0.318773	38.0182	8.66926	1.18925e-05
left short insular gyri	-7.40374	4.03114	0.0663073	-9.71973	3.71446	0.00889734	-8.69563	3.97637	0.0287891	-14.2599	9.66845	0.14029	-0.3276	12.7352	0.979478	-0.794552	10.5607	0.940029	20.3489	5.99022	0.000685134		-17.4055	3.65287	1.96078e-06	-6.75992	3.39454	0.0465076	-4.93276	2.4236	0.0418904	-13.3423	5.41284	0.0137479	-2.94382	5.1633	0.568615	-9.43113	6.80511	0.165863	60.6029	12.3441	9.51801e-07
left middle occipital gyrus	-35.7883	12.4755	0.00413448	-33.8467	11.4295	0.00307358	-33.0879	12.2665	0.0070053	3.77513	29.9906	0.899833	-65.2154	39.6044	0.0996718	-43.3686	32.7133	0.184978	64.7721	18.6062	0.000502287		-16.8808	11.2047	0.132002	-2.41116	10.3295	0.815444	-10.9876	7.37025	0.136098	-21.1798	16.5571	0.200907	6.78558	15.7715	0.667044	-13.4828	20.7588	0.516056	124.447	37.8222	0.00100992
left superior occipital gyrus	-16.6784	6.04437	0.00580746	-11.5618	5.53913	0.0368988	-13.8563	5.94365	0.0197681	-15.3487	14.5286	0.290801	-15.8722	19.1903	0.408211	-20.6397	15.8489	0.192865	17.1901	9.01988	0.0567181		-19.441	5.51325	0.000426527	-5.18976	5.08876	0.307866	-5.79608	3.63122	0.110532	-19.7719	8.15324	0.0153536	-15.476	7.76687	0.0463804	-19.5419	10.2237	0.056024	53.4433	18.6417	0.0041684
left lateral occipito-temporal gyrus	-24.6321	10.3462	0.0173031	-11.1405	9.53569	0.242728	-15.663	10.2067	0.124934	6.37933	24.8301	0.797249	4.21615	32.7054	0.89743	29.6376	27.1128	0.27438	51.3007	15.3837	0.000858327		-14.8053	9.61121	0.123543	-7.94042	8.85975	0.370184	-2.37326	6.32391	0.707471	-7.72191	14.2051	0.586749	15.457	13.5268	0.253235	8.01463	17.8073	0.652683	127.818	32.4237	8.22295e-05
left lingual gyrus	-11.4388	11.1051	0.303023	-3.17878	10.2346	0.756121	-14.401	10.9538	0.188653	6.77811	26.6384	0.799156	46.8841	35.08	0.181434	-33.9605	29.0886	0.243054	11.0764	16.5158	0.502463		-15.5545	10.1672	0.126134	-15.9584	9.4235	0.0904482	-0.343864	6.73018	0.959254	-14.4781	15.0359	0.335659	-0.637608	14.3335	0.964521	-15.3166	18.8926	0.417578	73.707	34.357	0.03199
left parahippocampal gyrus	-7.57719	9.71794	0.435588	-12.4687	8.90262	0.161391	-17.9047	9.55245	0.0609234	-8.98004	23.3483	0.700536	2.96046	30.8392	0.923526	-9.17148	25.4712	0.718804	52.1911	14.4845	0.00031653		-16.1487	9.23856	0.0805504	-20.4257	8.51144	0.0164522	-2.98759	6.07918	0.623139	-14.5085	13.6541	0.288043	-10.1119	13.0047	0.436878	-31.3356	17.1113	0.0671375	67.7886	31.2137	0.0299358
left orbital gyri	-28.5232	10.1564	0.00499316	-27.8085	9.30452	0.00281158	-20.8219	9.98818	0.0371377	-49.5294	24.4077	0.042471	-23.7771	32.2466	0.460933	-16.747	26.6342	0.529516	68.956	15.1375	5.32229e-06		-23.8036	9.3079	0.010586	-17.5847	8.58102	0.0405063	-4.07854	6.12746	0.505697	-31.4285	13.7555	0.02238	-15.3195	13.107	0.242557	-34.2791	17.2463	0.0469263	113.932	31.4276	0.000292513
left angular gyrus	-39.5302	15.9073	0.0129776	-23.7055	14.5779	0.103969	-24.6757	15.6439	0.114766	-50.1721	38.2299	0.189437	-57.4339	50.4964	0.255417	-39.3081	41.7085	0.345996	89.8965	23.717	0.00015171		-26.5655	14.3587	0.0643728	-19.3986	13.2356	0.142828	-14.3095	9.44626	0.129898	-15.3644	21.2241	0.469164	-12.8231	20.2136	0.525872	5.37587	26.6076	0.839894	151.887	48.4826	0.00174465
left supramarginal gyrus	-45.0245	19.6452	0.0219427	-29.4538	18.0022	0.10186	-30.4614	19.3187	0.114891	-25.8539	47.215	0.584	-6.98679	62.3638	0.910801	29.0318	51.5079	0.573019	87.7624	29.2996	0.00275121		-46.4495	17.5208	0.00805629	-21.5044	16.1588	0.183329	-9.34629	11.5345	0.417824	-18.5759	25.9105	0.473462	-8.57241	24.6777	0.728329	6.59474	32.4826	0.839127	200.599	59.1746	0.000706221
left superior parietal lobule	-30.7372	16.4125	0.0611405	-49.9192	15.0287	0.000899812	-36.2386	16.1346	0.0247353	-82.7887	39.4287	0.0357912	-27.2471	52.094	0.600966	-77.0541	43.0175	0.0733016	30.5433	24.4884	0.212347		-34.4798	14.2691	0.0157224	-30.8489	13.1514	0.0190436	-3.44022	9.39299	0.714196	-35.646	21.092	0.0911049	-36.5923	20.0862	0.0685691	-40.6256	26.442	0.124522	120.146	48.2184	0.0127555
left postcentral gyrus	-26.3475	10.8368	0.0150709	-19.4432	9.93014	0.0502713	-25.7432	10.6546	0.0157114	-56.2939	26.038	0.0306536	-58.6241	34.396	0.0883541	-61.6002	28.4054	0.0301471	34.7326	16.1684	0.0317349		-18.3034	9.85432	0.0633318	-11.8204	9.08407	0.193261	-20.8768	6.47604	0.00127623	-11.0394	14.566	0.448566	-9.2641	13.8724	0.504298	-28.6478	18.2549	0.116657	69.0339	33.2977	0.0382182
left precentral gyrus	-34.459	11.5914	0.00296123	-24.124	10.6814	0.0239453	-11.843	11.4377	0.300505	-29.0926	27.8259	0.295819	-30.7273	36.6544	0.401892	-61.3345	30.3792	0.0435302	47.9646	17.2459	0.00543054		-33.8839	10.7568	0.00164539	-26.6621	9.9172	0.00720955	-13.6353	7.08136	0.0542393	-15.8261	15.9126	0.320011	-21.0993	15.1528	0.163872	-33.8198	19.9426	0.0899949	67.2499	36.3823	0.0646191
left precuneus	-14.1885	13.4977	0.293212	-19.1237	12.3653	0.122017	-29.0166	13.2671	0.028768	-60.6781	32.4227	0.0613225	-79.8403	42.8246	0.0623147	-48.0885	35.375	0.174068	21.7617	20.1364	0.279861		-26.4842	12.2152	0.0302104	-14.122	11.2624	0.209957	2.68501	8.03975	0.738423	-9.81997	18.0593	0.586637	-16.1634	17.1978	0.347354	-3.58176	22.6394	0.8743	97.173	41.2751	0.0186096
left gyrus rectus	-7.51878	4.69487	0.109315	-9.29301	4.32726	0.0317848	-4.29302	4.63265	0.354122	-5.28153	11.2572	0.638965	12.5582	14.8232	0.396912	-18.709	12.2931	0.128077	17.7845	6.97551	0.0108075		-12.8026	4.22396	0.00245441	-12.279	3.91791	0.00173726	-5.42761	2.80154	0.0527752	-9.45097	6.25125	0.130655	-3.6447	5.95957	0.540859	-11.719	7.85818	0.135964	44.9784	14.2743	0.00163974
left subcallosal gyrus	0.460573	3.49851	0.895266	-3.12054	3.20509	0.33028	-1.41645	3.43963	0.680497	-19.7901	8.40181	0.0185284	8.84686	11.1013	0.425524	-17.7927	9.16694	0.0523044	16.5518	5.21539	0.00151204		-7.31626	3.32547	0.0278624	-1.12907	3.06673	0.712768	-1.153	2.18874	0.598373	-4.94828	4.91609	0.314217	3.2557	4.68227	0.486894	-9.21744	6.16167	0.134755	28.0244	11.236	0.0126674
left anterior transverse temporal gyrus	-8.34734	3.57599	0.0196103	-1.55861	3.27755	0.634417	-1.10882	3.51722	0.752578	-3.58535	8.59468	0.676575	-1.78279	11.3522	0.875215	-3.23062	9.3762	0.730439	22.4871	5.33	2.48611e-05		-10.8603	3.30101	0.0010111	-5.10529	3.0455	0.0937545	-4.43632	2.17324	0.0412864	-10.5729	4.88142	0.0303773	-8.89016	4.64956	0.0559459	-9.65223	6.12097	0.1149	52.4666	11.1387	2.5626e-06
left lateral aspect of the superior temporal gyrus	-30.7037	12.1201	0.0113218	-12.5837	11.1085	0.257339	-4.65157	11.9217	0.696418	-16.661	29.1316	0.567394	24.4185	38.4774	0.525699	14.148	31.7807	0.656206	93.5844	18.0542	2.24007e-07		-30.2438	11.0407	0.00618585	-22.1769	10.1791	0.0294174	-15.6513	7.26507	0.0312778	-43.0031	16.3146	0.00842664	-7.60447	15.5513	0.624875	-27.6041	20.4653	0.177475	171.585	37.2435	4.21754e-06
left planum polare of the superior temporal gyrus	-9.95791	4.7352	0.0355063	-8.66645	4.36276	0.0470222	-9.46158	4.67014	0.0428062	-1.01583	11.3637	0.928772	-2.17856	14.9682	0.884284	-12.2269	12.4085	0.32448	27.81	7.0381	7.84965e-05		-13.9902	4.39952	0.001485	-5.36863	4.05917	0.186051	-4.6118	2.8968	0.111461	-4.22696	6.50891	0.516112	1.49142	6.19919	0.809892	-19.5677	8.15363	0.016449	43.5054	14.8707	0.00345858
left planum temporale	-13.5715	6.87994	0.04858	-2.0414	6.3051	0.746122	-10.1239	6.76504	0.13457	-15.6557	16.5328	0.343698	-29.6379	21.8353	0.174718	15.3941	18.0362	0.393407	23.7676	10.2627	0.020592		-17.2387	6.2907	0.00616616	-3.4741	5.80312	0.549435	-6.81182	4.14051	0.100019	-17.4746	9.29983	0.0603186	-9.66864	8.85962	0.275204	-22.1654	11.6579	0.057335	47.7558	21.2655	0.0247813
left inferior temporal gyrus	-40.9997	17.4456	0.0187945	-37.4516	16.0707	0.0198129	-32.7323	17.2061	0.0571655	-42.2549	41.8707	0.312926	-43.1156	55.1566	0.434421	-8.83789	45.7255	0.846744	107.352	25.9334	3.52219e-05		-17.7248	15.9841	0.267542	-18.6415	14.8136	0.208323	-18.1966	10.5728	0.0853194	9.50418	23.6369	0.68764	8.9596	22.5301	0.690894	-14.4783	29.6966	0.625905	214.318	53.9265	7.19143e-05
left middle temporal gyrus	-60.755	16.1879	0.000176097	-39.454	14.8388	0.00785935	-43.121	15.9234	0.00678549	-39.896	38.9287	0.305471	-56.2364	51.4172	0.274114	-41.0116	42.4686	0.334232	81.644	24.1545	0.000728723		-44.9398	14.634	0.00214925	-10.9673	13.5027	0.416709	-12.6232	9.63574	0.190261	-13.4027	21.6486	0.535885	-1.83843	20.6185	0.928956	2.76694	27.1394	0.918799	183.478	49.4256	0.000208426
left horizontal ramus of the anterior segment of the lateral sulcus	-2.17613	1.44926	0.133261	-1.5779	1.32788	0.234762	-0.916944	1.42507	0.519962	-6.76862	3.48147	0.0519143	-1.68646	4.59962	0.713889	-0.585024	3.79907	0.877621	3.00913	2.16212	0.164043		-2.02082	1.35471	0.135863	0.615658	1.24886	0.622058	1.11217	0.891179	0.212118	-2.93725	2.0017	0.142357	-1.06401	1.90683	0.576877	-0.712589	2.50996	0.776499	8.99872	4.57709	0.0493675
left vertical ramus of the anterior segment of the lateral sulcus	-3.59901	2.06204	0.0809661	1.1933	1.88959	0.527728	-2.28974	2.02762	0.258822	-3.22931	4.95502	0.5146	1.2081	6.54488	0.853558	-4.79811	5.40541	0.374761	4.45142	3.07645	0.147961		-0.687608	1.92285	0.720664	-1.97419	1.77189	0.265275	-0.144847	1.26483	0.908833	-1.31879	2.84112	0.642546	-0.930089	2.70583	0.731065	-3.28748	3.56124	0.355999	2.15979	6.49805	0.739624
left posterior ramus of the lateral sulcus	-5.41875	3.06023	0.0766553	-0.962341	2.80438	0.731491	-2.49173	3.0093	0.407694	8.30748	7.35324	0.258612	12.1537	9.7121	0.210833	10.4111	8.02159	0.194372	8.91199	4.56516	0.0509582		-7.10142	2.77949	0.0106594	-0.34964	2.56384	0.891533	-2.43845	1.82943	0.182645	-3.79257	4.10996	0.356183	-4.0684	3.91409	0.298673	-11.4561	5.14934	0.0261551	28.039	9.38996	0.00284407
left occipital pole	-5.07054	6.08492	0.404706	-10.6376	5.60726	0.0578543	-17.8772	5.99929	0.00289369	16.2886	14.5919	0.264345	16.2152	19.2177	0.398831	-1.62532	15.9376	0.918775	17.8188	9.04501	0.0488774		-12.97	5.68274	0.0225237	-3.65319	5.2729	0.488463	-5.6823	3.76501	0.131322	-28.4837	8.39557	0.000699162	-10.8909	8.01232	0.174141	-23.4306	10.5601	0.0265608	37.5209	19.2106	0.0508774
left temporal pole	-8.39627	8.65121	0.331816	-20.329	7.9229	0.0103136	-8.88814	8.50561	0.296072	-7.37965	20.7859	0.722577	14.0703	27.4542	0.608317	-34.4867	22.6722	0.128281	49.8184	12.893	0.000112594		-19.3524	7.94455	0.0148994	-12.4547	7.32481	0.0891488	-8.95676	5.22782	0.0867413	-28.2704	11.7388	0.0160754	-9.53187	11.1872	0.39425	-41.1374	14.7115	0.0051958	100.155	26.8193	0.000190917
left calcarine sulcus	-8.12174	8.15613	0.319391	-10.6947	7.47201	0.152391	-12.8818	8.01801	0.108188	-23.8619	19.5945	0.223347	38.2286	25.8795	0.139674	-27.4447	21.3759	0.199218	-9.66208	12.168	0.42719		-11.2581	7.49187	0.132998	-6.32492	6.90598	0.359798	-6.55942	4.92831	0.18328	-25.9897	11.065	0.0188843	-3.31696	10.5455	0.753131	-31.7268	13.8713	0.0222376	41.7399	25.3163	0.0992848
left central sulcus	-21.2296	5.95913	0.000369809	-7.35976	5.49721	0.180675	-12.9124	5.88251	0.0281939	-16.9437	14.301	0.236144	-29.9219	18.8316	0.112125	-37.4686	15.6139	0.0164356	16.6845	8.86473	0.0598615		-13.627	5.44091	0.0123027	-7.27302	5.048	0.149732	-5.32806	3.60512	0.139514	-7.6757	8.05066	0.340435	-2.15556	7.6743	0.778818	-13.9159	10.1164	0.169033	35.4569	18.3961	0.054003
left marginal branch of the cingulate sulcus	-8.22013	3.81633	0.0312802	-5.42764	3.49707	0.120695	-6.39996	3.75262	0.0881529	-8.66039	9.1713	0.345054	2.64475	12.1144	0.827191	-9.62112	10.0052	0.336277	15.4252	5.69224	0.00674789		-8.19304	3.46639	0.0181502	-5.10224	3.19598	0.11047	-1.18541	2.28171	0.603424	-8.12366	5.12391	0.11295	-0.0909609	4.88148	0.985134	-6.39424	6.42446	0.319656	23.8293	11.7164	0.0420377
left anterior segment of the circular sulcus of the insula	-1.76935	2.16066	0.412875	-3.06407	1.97933	0.121661	-4.12268	2.12384	0.0522816	-11.6738	5.18934	0.0245074	1.51019	6.85671	0.825683	-5.81329	5.66284	0.304661	9.6883	3.22139	0.00264375		-6.52562	1.99261	0.00106649	-4.72453	1.83743	0.0101706	-1.1974	1.3124	0.36163	-2.66281	2.94807	0.366457	-1.92384	2.80778	0.493271	-4.29241	3.69535	0.245483	16.6775	6.73785	0.0133597
left inferior segment of the circular sulcus of the insula	-1.82819	4.07722	0.653885	-1.42046	3.73553	0.703766	3.94708	4.00842	0.324807	-6.93854	9.79536	0.478752	10.2796	12.9378	0.426908	3.78881	10.6863	0.722939	25.3503	6.07492	3.04427e-05		-5.69234	3.83989	0.138311	-0.308451	3.53995	0.930569	-0.400639	2.52652	0.874014	1.43389	5.67531	0.800549	9.34816	5.40291	0.0836746	5.93099	7.1138	0.404485	42.7953	12.9616	0.000969908
left superior segment of the circular sulcus of the insula	-4.92638	3.96052	0.213589	-4.39467	3.62862	0.225894	-1.74509	3.89429	0.654085	-10.6129	9.5154	0.264746	13.5348	12.5682	0.281558	-1.93981	10.3815	0.851782	18.7898	5.90476	0.0014685		-11.5879	3.65993	0.00155695	-3.9396	3.37693	0.243437	-4.17442	2.40965	0.0832884	-13.6397	5.41042	0.011743	-4.63655	5.1565	0.368621	-13.12	6.78468	0.0532156	53.3834	12.3542	1.59279e-05
left anterior transverse collateral sulcus	-9.21496	4.29236	0.031842	-4.79158	3.93353	0.223214	-3.14477	4.22142	0.456324	-1.63697	10.3159	0.873922	-5.33529	13.6253	0.695388	6.71619	11.2536	0.550659	14.4527	6.4033	0.0240356		-9.92709	4.05736	0.0144628	-4.59395	3.74156	0.219593	-2.49487	2.67064	0.35027	-11.7713	5.99672	0.0497246	-3.24796	5.71376	0.569766	-3.38072	7.52092	0.653091	44.6724	13.703	0.00112376
left posterior transverse collateral sulcus	-1.65828	1.76573	0.347687	1.8666	1.61769	0.248595	-1.01142	1.7361	0.560194	0.574102	4.24245	0.89236	0.688457	5.60352	0.90222	-0.701586	4.6282	0.879515	-0.503189	2.63435	0.848523		0.0701282	1.64056	0.965906	-0.604453	1.51194	0.689337	0.786472	1.07905	0.466133	-1.58524	2.4239	0.513148	-0.386517	2.30857	0.867043	3.67932	3.03811	0.225951	6.35135	5.54309	0.251945
left inferior frontal sulcus	-5.57903	10.3469	0.589769	-2.62305	9.53423	0.783233	-11.835	10.2048	0.24619	-31.1592	24.8181	0.209339	2.08731	32.6924	0.949094	12.2114	27.1053	0.652352	38.0243	15.383	0.0134663		0.492539	9.41648	0.958288	-12.6264	8.72668	0.148016	4.97562	6.23185	0.424678	-18.3443	13.92	0.187639	12.9233	13.2694	0.330163	6.60045	17.4943	0.705978	37.1099	31.8234	0.243639
left middle frontal sulcus	-8.99934	6.93074	0.194171	-6.67539	6.35017	0.293197	-1.04949	6.815	0.877616	-1.07444	16.6532	0.94856	3.73975	21.9959	0.864999	8.24157	18.1672	0.650094	18.687	10.3384	0.0707225		-10.8793	6.40823	0.0896441	-4.39302	5.90778	0.457166	1.86862	4.21669	0.657684	-9.4002	9.47098	0.321004	10.1775	9.01954	0.259231	-4.61689	11.8738	0.697424	51.2085	21.648	0.0180558
left superior frontal sulcus	-10.3828	13.2823	0.434417	-8.89243	12.2395	0.467537	-21.3806	13.0993	0.102686	-0.957583	31.8617	0.976025	16.071	41.9646	0.701757	-32.5429	34.7928	0.349648	51.586	19.7453	0.00900596		-50.2843	12.1334	3.48345e-05	-18.0605	11.2684	0.109073	-11.7271	8.04548	0.145032	-22.0571	17.9767	0.219907	-20.7916	17.135	0.225053	-54.6661	22.5749	0.0155018	118.853	41.059	0.00381701
left sulcus intermedius primus	2.28261	3.23463	0.480412	0.0679814	2.96365	0.9817	-7.36215	3.17909	0.0205985	-6.29229	7.77114	0.418142	-13.4833	10.2635	0.188986	1.95537	8.47811	0.817604	10.8039	4.82396	0.0251465		-5.54909	2.9764	0.062348	-2.07777	2.74417	0.449002	-2.39253	1.95832	0.221889	-3.62959	4.39946	0.409419	-4.32965	4.18971	0.301481	0.146129	5.51552	0.978865	33.5469	10.0482	0.000850191
left intraparietal sulcus and transverse parietal sulci	-23.7873	10.433	0.022638	-11.5469	9.61587	0.229866	-8.62872	10.2937	0.401917	-62.5623	25.0249	0.0124426	-12.1347	32.9759	0.712895	-7.97466	27.3408	0.770543	29.1041	15.5195	0.0607915		-16.3755	9.57586	0.0873323	-2.24118	8.82866	0.799623	2.47317	6.30109	0.694713	-4.05973	14.1543	0.774267	4.64398	13.4801	0.730484	-23.1308	17.7396	0.192346	105.108	32.3278	0.00115886
left middle occipital sulcus and lunatus sulcus	-8.10955	4.30397	0.0595802	-2.16469	3.94421	0.583141	-9.05779	4.23126	0.032335	10.4356	10.3423	0.312999	3.1144	13.6612	0.819674	-7.31261	11.2831	0.516941	17.2062	6.41915	0.00737006		-5.8677	4.01989	0.144465	-4.01723	3.70529	0.27835	-3.81104	2.64421	0.149589	-11.016	5.93864	0.0636774	-1.53727	5.6583	0.78588	-12.4049	7.44515	0.0957626	38.5556	13.5741	0.00453008
left superior occipital sulcus and transverse occipital sulcus	-10.3389	4.78448	0.0307354	-3.39019	4.38481	0.439451	-1.37537	4.70559	0.770078	-14.4389	11.4974	0.209216	-13.9785	15.1868	0.357375	-14.995	12.5429	0.231936	14.9471	7.13785	0.0362915		-7.05974	4.31593	0.101977	-1.98879	3.97893	0.617223	-5.17261	2.83868	0.0685057	-7.51845	6.37817	0.238561	-7.5119	6.07427	0.216285	-7.49548	7.99602	0.348612	12.7671	14.5888	0.38156
left anterior occipital sulcus and preoccipital notch	-7.42877	4.39973	0.0913686	-7.90659	4.03071	0.049851	-7.96088	4.32556	0.0657488	7.23101	10.5723	0.494023	-15.8219	13.9632	0.257206	-5.44839	11.5337	0.636665	16.1865	6.56216	0.0136633		-5.19116	4.0128	0.195865	-3.93533	3.69856	0.287388	-2.43772	2.63982	0.355835	3.31865	5.93026	0.575777	5.32566	5.64738	0.345725	5.17095	7.43383	0.486724	41.5387	13.547	0.00218275
left lateral occipito-temporal sulcus	-11.2525	4.36548	0.00996959	-5.52586	4.00101	0.167288	-2.65072	4.29403	0.537055	2.34082	10.4932	0.82348	-22.1502	13.8571	0.109984	-0.642301	11.4473	0.955256	20.5026	6.51106	0.00164598		-5.02332	4.03869	0.213651	-3.16273	3.72256	0.395596	0.685759	2.65708	0.796354	4.88618	5.96815	0.413004	6.15961	5.68351	0.278536	-6.2507	7.48146	0.403494	50.8608	13.626	0.000192286
left medial occipito-temporal sulcus and lingual sulcus	-12.1248	6.13818	0.0482735	-5.39737	5.62498	0.337323	-5.84485	6.03625	0.332933	-9.48149	14.7508	0.520391	3.35446	19.4837	0.863311	5.73979	16.0924	0.721344	37.5965	9.14851	4.01042e-05		-17.3808	5.64892	0.00210714	-3.55354	5.21235	0.495437	-1.29179	3.72032	0.72844	-4.1497	8.35683	0.619525	1.13968	7.95904	0.886145	-0.843249	10.4762	0.93585	56.1243	19.0919	0.00330525
left lateral orbital sulcus	1.2806	1.97105	0.515904	-0.358403	1.80591	0.84269	-2.17402	1.93777	0.261937	-0.725575	4.7356	0.878232	-7.92595	6.25416	0.205088	0.351325	5.16619	0.945784	4.13145	2.94016	0.160014		-0.291859	1.77841	0.869652	-1.23002	1.63891	0.452994	0.782336	1.16973	0.503654	-4.67871	2.62664	0.074951	-0.946816	2.50253	0.705197	-3.90729	3.29344	0.235545	9.84116	6.0078	0.101492
left medial orbital sulcus	-1.33365	1.73574	0.442308	-3.42299	1.59861	0.0322914	-1.68767	1.71174	0.3242	-7.15586	4.16356	0.0857165	-2.06903	5.48547	0.706049	-6.59222	4.54695	0.147157	7.28645	2.5808	0.00476657		-5.07282	1.59808	0.00151396	-2.28906	1.48269	0.122706	-1.3837	1.05856	0.191237	-1.76582	2.36583	0.45548	3.68509	2.25436	0.102206	-3.9794	2.972	0.180662	20.1571	5.39911	0.000191681
left orbital sulci	-16.3947	4.60768	0.000376041	-8.11697	4.2243	0.0547109	-4.37982	4.53407	0.334089	-11.3965	11.0794	0.303695	1.98799	14.635	0.891953	-6.3457	12.0875	0.599614	18.3957	6.87671	0.00748911		-10.0923	4.27904	0.0183979	-3.29412	3.94619	0.403905	-0.268204	2.81672	0.924146	-5.23378	6.32665	0.408142	3.24922	6.02563	0.589757	-6.20713	7.93096	0.433885	23.8855	14.4659	0.0987886
left parieto-occipital sulcus	-21.6759	8.03693	0.00701311	-20.1365	7.36326	0.00625946	-19.1923	7.90254	0.0151821	-23.0042	19.3171	0.233746	44.2634	25.5115	0.0827792	-27.407	21.0731	0.19345	17.86	11.9943	0.136522		-17.4059	7.40819	0.0188477	-12.2637	6.82962	0.0726274	-14.8409	4.87053	0.00232681	-8.88051	10.9531	0.417547	-11.2897	10.4307	0.279169	-25.3928	13.7255	0.0643852	46.3678	25.0419	0.0641603
left pericallosal sulcus	-6.9203	4.34908	0.111609	-6.59276	4.00672	0.0999277	-0.376353	4.28994	0.930094	-1.49106	10.4359	0.886391	12.192	13.7456	0.375126	-1.63975	11.3961	0.885594	28.8248	6.46156	8.29043e-06		-7.21942	3.93597	0.0667	-7.53668	3.62702	0.0377837	1.09879	2.59008	0.671422	-5.39744	5.81759	0.353581	-0.971023	5.54111	0.860901	3.04457	7.29341	0.67638	10.7424	13.3059	0.419517
left postcentral sulcus	-23.2242	11.3201	0.0402479	-16.8093	10.4327	0.10718	-21.4355	11.1664	0.0549451	-34.616	27.158	0.202489	-3.87577	35.7737	0.913728	11.3544	29.6615	0.701881	25.4258	16.8379	0.13108		-24.1723	10.3835	0.0199676	0.510298	9.57655	0.957507	-14.9984	6.83061	0.0281695	8.08794	15.3528	0.59836	4.48487	14.6219	0.759072	-14.438	19.2451	0.45317	58.6366	35.102	0.0949106
left inferior part of the precentral sulcus	-13.6502	8.02109	0.0888401	4.70606	7.3502	0.522024	-1.8404	7.88782	0.815518	-5.80532	19.2747	0.76328	35.9515	25.4549	0.15789	-28.7738	21.0245	0.171175	24.0368	11.9652	0.0445884		-16.9243	7.31391	0.020722	-16.5154	6.74009	0.0143178	-0.700097	4.81431	0.884387	2.55304	10.8144	0.813385	-3.05744	10.2992	0.76659	-15.3089	13.5544	0.258782	42.9617	24.724	0.0823539
left superior part of the precentral sulcus	-17.5004	5.90876	0.00306937	-9.84707	5.44807	0.0707375	0.0729735	5.83273	0.990018	-12.7895	14.1786	0.367073	-30.4404	18.6704	0.103061	-9.44184	15.4852	0.542058	5.3186	8.79088	0.54519		-14.2292	5.48197	0.00947808	-0.142245	5.08708	0.977694	-4.77315	3.63175	0.18883	8.59759	8.11157	0.28925	-4.27313	7.7324	0.580552	-7.46229	10.1941	0.464202	29.106	18.5395	0.116512
left suborbital sulcus	-5.28157	3.87587	0.173028	-4.50682	3.55111	0.204438	-2.67358	3.81106	0.482995	-11.1996	9.3121	0.229137	2.70729	12.3009	0.825808	-1.72046	10.1599	0.865535	16.4902	5.77953	0.00434118		-4.23242	3.5129	0.228347	0.0540206	3.23819	0.986691	1.39735	2.31104	0.545455	1.18177	5.19152	0.819942	1.33297	4.94424	0.787482	-5.53019	6.50735	0.395469	29.3762	11.8641	0.0133276
left subparietal sulcus	-4.78218	4.75422	0.314508	-4.98472	4.35568	0.25249	-9.32991	4.67323	0.045924	-22.5441	11.4196	0.0484052	-16.2815	15.0863	0.280527	-6.28376	12.4613	0.614094	17.9916	7.08973	0.0111803		-9.53194	4.40187	0.0304173	-4.65738	4.05867	0.251242	-1.29359	2.89717	0.655261	-0.00985558	6.5081	0.998792	1.16224	6.1981	0.851266	7.7885	8.15737	0.33975	42.986	14.8684	0.00386086
left inferior temporal sulcus	-12.4451	5.84137	0.0331647	-15.9784	5.38129	0.00299562	-16.8792	5.76025	0.00339779	-10.9462	14.0151	0.434812	-6.52104	18.4596	0.723904	-15.3342	15.3051	0.316428	24.99	8.68472	0.00402127		-11.1013	5.45257	0.041822	-10.7567	5.05453	0.0333908	-7.20103	3.60931	0.0461006	-3.94701	8.06632	0.624643	-3.63504	7.68851	0.636391	-6.09121	10.1357	0.547897	48.3765	18.4232	0.00867831
left superior temporal sulcus	-77.5269	20.3352	0.000138813	-32.8744	18.7564	0.079699	-68.387	20.064	0.000657154	-83.0873	48.8131	0.0887723	-47.6461	64.2991	0.458714	-40.5422	53.3177	0.447048	173.239	30.1971	1.0054e-08		-51.1185	18.7628	0.00647034	-16.0788	17.3072	0.352935	-31.0659	12.3435	0.0118844	-4.43515	27.7504	0.873029	5.4726	26.4286	0.835965	-22.3916	34.7853	0.519803	234.577	63.3541	0.000216421
left transverse temporal sulcus	-3.05926	1.92822	0.112656	0.266666	1.76694	0.880044	1.03573	1.8961	0.584916	-2.27018	4.63335	0.624174	11.2388	6.11842	0.0662721	2.92579	5.0546	0.562718	0.851962	2.87712	0.76715		-0.958849	1.74421	0.582536	-1.23419	1.60745	0.442657	-0.155846	1.14735	0.891961	-2.42363	2.577	0.347028	-3.51884	2.45388	0.151658	-2.90206	3.23048	0.369064	10.2546	5.89223	0.0818764
right fronto-marginal gyrus and sulcus	-13.3047	4.16647	0.00141311	-12.004	3.81738	0.00167054	-10.3983	4.09752	0.01118	-1.68445	10.0175	0.866469	2.83442	13.2313	0.83038	7.44093	10.9279	0.495953	2.38247	6.2203	0.701721		-7.39494	3.77424	0.0501492	-7.59043	3.47801	0.0291409	-3.67825	2.48315	0.138615	-4.33649	5.57909	0.437045	3.70861	5.31345	0.485241	-6.14162	6.99362	0.379905	6.83592	12.7606	0.592193
right inferior occipital gyrus and sulcus	-10.7845	7.28644	0.138897	-9.09983	6.67595	0.172903	-12.1078	7.16354	0.0910344	-9.07287	17.5082	0.604331	-4.2006	23.1256	0.855869	-9.92939	19.1002	0.603179	28.9106	10.8663	0.00781933		-12.5843	6.66457	0.0590697	-3.80242	6.1448	0.536084	-4.40792	4.38529	0.314884	-10.7976	9.85045	0.273082	-2.77065	9.38266	0.767785	0.0020638	12.3502	0.999867	51.8754	22.5169	0.0212855
right paracentral lobule and sulcus	-5.85439	5.78957	0.311959	-0.72476	5.30475	0.891331	-8.66484	5.69165	0.127961	-22.0681	13.908	0.112623	-23.1621	18.3712	0.207431	-3.83257	15.1753	0.800621	-0.627489	8.63778	0.942091		-1.02159	5.26852	0.846261	-0.938724	4.85559	0.846712	-1.77078	3.46542	0.609392	5.17746	7.7842	0.506012	-4.97639	7.41344	0.502092	-11.5376	9.75681	0.237074	33.342	17.7962	0.0610697
right subcentral gyrus and sulci	-26.7065	7.15676	0.000191786	-2.20699	6.56361	0.736695	-17.6003	7.04034	0.0124454	-1.94904	17.2117	0.909845	-3.47511	22.7336	0.878511	-2.0729	18.7767	0.912098	46.4603	10.6728	1.36169e-05		-16.578	6.47026	0.0104398	-1.00731	5.96828	0.865981	-12.224	4.25505	0.00409102	-17.5294	9.5643	0.0669117	-9.71682	9.11143	0.286291	-31.5682	11.9839	0.00846733	82.1863	21.8436	0.000170779
right transverse frontopolar gyri and sulci	-19.4431	6.05955	0.00133973	-14.238	5.55323	0.010371	-14.5319	5.95953	0.0147769	-15.7648	14.5679	0.279218	-28.5152	19.2401	0.138369	-17.7937	15.8924	0.262909	25.8944	9.0413	0.00419583		-9.62678	5.42112	0.0758479	-9.49321	4.99593	0.0574846	-6.6966	3.56572	0.0604514	-13.3869	8.01048	0.0947702	-13.06	7.62881	0.0869911	-21.7461	10.0392	0.0303643	45.457	18.3127	0.0130983
right anterior part of the cingulate gyrus and sulcus	-42.6551	10.396	4.12517e-05	-29.7367	9.52967	0.00181344	-34.4993	10.2252	0.000745131	-33.8305	25.0039	0.176098	63.0464	33.0213	0.0562702	-15.0895	27.2805	0.580196	62.073	15.5101	6.34488e-05		-30.5414	9.63632	0.00153973	-22.7295	8.88515	0.010562	-6.3308	6.34612	0.318544	-5.52704	14.2569	0.698279	3.55409	13.578	0.793526	-22.8656	17.8685	0.200744	129.507	32.5399	7.02281e-05
right middle-anterior part of the cingulate gyrus and sulcus	-21.1248	6.32111	0.000836428	-11.4658	5.79443	0.0478839	-10.2156	6.21864	0.100482	-31.9794	15.194	0.0353509	-2.04345	20.0751	0.918926	-11.8972	16.5803	0.473059	23.8266	9.43341	0.011567		-14.568	5.89486	0.0135061	-3.86789	5.43685	0.476868	-3.81578	3.88014	0.325468	-0.0994274	8.71709	0.9909	0.204093	8.30191	0.980388	-10.2074	10.9262	0.350255	56.1426	19.9161	0.00484311
right middle-posterior part of the cingulate gyrus and sulcus	-17.0498	5.92144	0.00399749	-10.3275	5.42703	0.057085	-13.7359	5.823	0.0183571	-26.6964	14.2313	0.0607124	1.13757	18.8018	0.951757	-19.2658	15.5275	0.21474	32.9945	8.83019	0.000188083		-13.4064	5.5133	0.0150764	-3.13842	5.08489	0.537136	-4.53844	3.62861	0.211107	5.53314	8.15214	0.497347	4.55299	7.76398	0.557625	-1.95668	10.2198	0.848176	72.5277	18.6088	9.88754e-05
right posterior-dorsal part of the cingulate gyrus	-7.90047	4.13626	0.0561686	-8.89157	3.7891	0.0189731	-4.51347	4.06741	0.267182	-3.97115	9.93996	0.689527	-3.78022	13.129	0.773409	-9.88173	10.8432	0.362155	14.6326	6.16976	0.0177357		-11.4802	3.71641	0.00202254	-4.79266	3.42856	0.162235	-2.62165	2.44728	0.284125	-5.47839	5.49745	0.319055	2.69821	5.23611	0.606368	0.670958	6.89233	0.922455	36.5817	12.5609	0.00360823
right posterior-ventral part of the cingulate gyrus	-3.77372	2.39025	0.11443	-0.501537	2.19033	0.818893	-3.77192	2.35004	0.10853	0.28275	5.74367	0.960739	-0.768687	7.58635	0.919295	-4.74256	6.26565	0.449127	-1.03707	3.56652	0.77123		-3.08813	2.15299	0.151558	-1.70526	1.9846	0.390257	-0.221388	1.41657	0.875817	-5.70961	3.18071	0.0727222	1.2514	3.03044	0.679671	-0.157165	3.98894	0.968573	12.8712	7.27474	0.0769252
right cuneus	-9.76523	7.65899	0.202352	-9.98204	7.01691	0.154907	-11.8505	7.5297	0.115571	-40.4425	18.3965	0.0279557	21.1989	24.3057	0.383144	-40.2537	20.0704	0.0449356	3.79963	11.4273	0.739518		-25.5889	6.90781	0.000214969	-15.0221	6.37324	0.0184714	-12.3141	4.54763	0.00680353	-28.337	10.2149	0.0055627	-14.5923	9.73533	0.133982	-28.7704	12.8095	0.0247606	64.7669	23.3626	0.00559437
right opercular part of the inferior frontal gyrus	-14.3667	8.2015	0.0798679	-11.5348	7.51455	0.124831	-9.44714	8.06456	0.241463	-17.9127	19.7074	0.36342	-24.1776	26.0299	0.353005	3.32524	21.5006	0.877096	23.6387	12.2348	0.0533897		-7.9648	7.40739	0.282331	-14.4175	6.82385	0.034682	-3.92183	4.87275	0.420957	-5.62476	10.9462	0.607384	-16.9435	10.4216	0.104074	-2.74839	13.7223	0.841267	41.4239	25.0271	0.0979752
right orbital part of the inferior frontal gyrus	-6.80436	3.6244	0.0605098	-2.24418	3.3214	0.499271	-4.49534	3.56395	0.20723	-10.969	8.70891	0.207888	-10.167	11.5036	0.376828	9.43844	9.50119	0.320552	11.3994	5.40668	0.035034		-3.27151	3.36311	0.330733	-1.64927	3.09979	0.594717	-3.39451	2.21177	0.124929	-5.88562	4.96893	0.236296	-3.07981	4.73288	0.515263	-12.7425	6.22662	0.0407808	31.2056	11.3553	0.00602251
right triangular part of the inferior frontal gyrus	-10.9371	8.3355	0.189527	-12.1871	7.63646	0.110556	-8.91793	8.19562	0.276575	-9.66735	20.0283	0.629336	10.0979	26.454	0.702686	7.87739	21.8496	0.718463	13.5834	12.4357	0.274746		-12.5388	7.67662	0.102473	-6.88763	7.07656	0.330466	1.12811	5.05126	0.823289	-15.9053	11.3438	0.160965	4.02811	10.8061	0.709347	-26.3226	14.2175	0.0641873	55.0259	25.9359	0.0339352
right middle frontal gyrus	-74.6344	23.6509	0.00160829	-55.4863	21.6742	0.0104881	-28.6307	23.2675	0.218551	-122.715	56.8436	0.0308995	-18.2278	75.1056	0.808248	-83.7523	62.025	0.176965	125.09	35.2767	0.000393819		-41.9319	21.5938	0.0522301	-47.5496	19.8963	0.0169029	-16.094	14.2086	0.257416	-39.3673	31.9159	0.217477	-25.861	30.399	0.394979	-73.8491	39.9988	0.0649294	168.266	72.9588	0.0211466
right superior frontal gyrus	-67.2687	29.876	0.0243797	-68.9301	27.5207	0.01228	-56.6408	29.4662	0.0546189	-137.237	71.6853	0.0556057	-25.9931	94.4506	0.783169	-2.15709	78.301	0.978023	162.16	44.4194	0.000263535		-76.505	27.6692	0.00572008	-62.0163	25.5064	0.0150866	-29.8298	18.2121	0.101523	-82.2594	40.9026	0.0443853	-47.6442	38.9675	0.221533	-152.861	51.2415	0.00287126	365.27	93.4106	9.37719e-05
right long insular gyrus and central sulcus of the insula	-9.01798	2.97861	0.0024744	-9.08774	2.74456	0.000933875	-6.61418	2.93903	0.0244513	-12.8661	7.1476	0.0718951	-7.44861	9.41563	0.428919	-5.5427	7.80728	0.477765	23.2265	4.42377	1.56373e-07		-6.49741	2.71912	0.0169189	-4.18885	2.50438	0.0944867	-1.61249	1.78974	0.367665	-4.10552	4.02017	0.307211	4.28236	3.82859	0.263416	3.41762	5.03995	0.497745	37.0564	9.11772	4.91748e-05
right short insular gyri	-10.5708	4.08234	0.0096346	-8.79778	3.76284	0.0194126	-3.1297	4.02903	0.437312	-3.57387	9.79543	0.715234	4.02398	12.9006	0.755109	4.01551	10.6976	0.707401	19.7871	6.06843	0.00111696		-10.6951	3.7324	0.00418675	-6.67909	3.46233	0.0537968	-2.97058	2.47306	0.229758	-20.5283	5.51451	0.000200056	-3.57202	5.26554	0.497575	-11.353	6.93978	0.101937	37.7062	12.6142	0.00281512
right middle occipital gyrus	-29.5448	13.5068	0.0287472	-26.9568	12.3749	0.0294142	-44.64	13.2733	0.000774829	-53.371	32.4552	0.100129	-48.9999	42.8719	0.253105	-24.5702	35.412	0.487806	74.5899	20.1369	0.000213781		-41.2873	12.2881	0.000787334	-0.247878	11.3419	0.982565	-9.70263	8.09336	0.230666	-52.4552	18.1636	0.00389994	-7.57557	17.3171	0.661801	-28.4107	22.7897	0.212605	115.248	41.5458	0.00556421
right superior occipital gyrus	-18.8267	7.33253	0.0102631	-29.0492	6.71205	1.52681e-05	-19.8264	7.20869	0.00596893	-17.7894	17.6237	0.312818	2.91096	23.2795	0.900492	-21.2216	19.2259	0.269716	27.6967	10.9391	0.0113672		-25.346	6.55941	0.000113386	-16.233	6.05145	0.00733942	-9.01612	4.32064	0.0369773	-40.5207	9.68873	2.95191e-05	-14.3979	9.24557	0.11949	-33.1944	12.1615	0.00637323	91.4536	22.1606	3.75678e-05
right lateral occipito-temporal gyrus	-34.9569	11.3877	0.00215124	-14.3211	10.4391	0.17015	-16.0205	11.2023	0.152731	-14.8237	27.3775	0.588212	12.9386	36.1612	0.720502	-0.864439	29.8675	0.976911	61.1574	16.9843	0.000319486		-22.3255	10.5768	0.0348543	-2.94137	9.7534	0.762994	-5.93822	6.96058	0.393646	11.229	15.636	0.47271	11.0933	14.8912	0.456346	0.664813	19.6022	0.972947	131.47	35.7	0.000234065
right lingual gyrus	-9.42703	11.0304	0.392778	0.0650083	10.1065	0.994868	-19.9681	10.8427	0.0655744	28.353	26.4998	0.284687	78.0426	34.9916	0.0257585	-23.6967	28.9103	0.412436	3.78238	16.4564	0.818221		-12.0295	10.0332	0.230616	-18.8529	9.24352	0.0414612	-15.4103	6.59613	0.0195296	-12.4307	14.8262	0.401843	11.6713	14.1201	0.408532	-33.1619	18.5796	0.0743653	57.8252	33.8994	0.0881296
right parahippocampal gyrus	-1.97043	8.21772	0.810509	-15.957	7.52657	0.0340342	-13.7149	8.07783	0.0895837	-3.66438	19.7432	0.852762	9.70682	26.0771	0.709729	5.97612	21.5383	0.781432	36.4461	12.2517	0.00294222		-13.8014	7.69387	0.0729211	-17.1838	7.08837	0.0153874	-7.14721	5.06168	0.158025	-23.5655	11.3666	0.0382196	-11.8744	10.8297	0.272945	-31.4015	14.2478	0.0275878	52.4106	25.9976	0.0438725
right orbital gyri	-33.3349	11.5512	0.00391618	-25.6439	10.6441	0.016013	-42.1333	11.3876	0.000217369	-18.448	27.7284	0.505874	2.02258	36.525	0.955841	8.93618	30.2804	0.767915	75.1417	17.1701	1.22513e-05		-31.0063	10.5842	0.00341544	-21.9015	9.81583	0.0257238	0.841322	7.01286	0.904515	-24.0785	15.6621	0.124284	-2.05722	14.933	0.890435	-38.2549	19.6761	0.0519413	155.563	35.7264	1.37042e-05
right angular gyrus	-40.1482	19.219	0.0367464	-22.1757	17.6119	0.208027	-5.15819	18.9017	0.784942	-55.3711	46.1839	0.230598	-71.2474	61.001	0.242859	-62.6552	50.3828	0.213696	98.9417	28.656	0.000558291		-22.2414	17.4481	0.202487	-4.45214	16.0838	0.781942	-0.420192	11.4794	0.970803	5.90803	25.7861	0.818791	-14.5713	24.557	0.55297	10.9148	32.3244	0.735636	32.529	58.9738	0.581266
right supramarginal gyrus	-38.9648	16.9134	0.0212652	-6.75473	15.5018	0.66304	-28.9973	16.6317	0.0812923	-12.1337	40.6503	0.765339	-9.42137	53.692	0.860715	-28.1798	44.3454	0.525148	43.357	25.2366	0.0858375		-50.5804	15.1799	0.00087029	-6.32007	14.0102	0.65194	-8.77802	9.99857	0.380039	-18.1215	22.4602	0.419816	-9.72863	21.3917	0.64929	-35.8023	28.1518	0.203537	227.816	51.24	8.99767e-06
right superior parietal lobule	-7.29044	14.298	0.610143	-26.3358	13.0961	0.0443681	-5.58416	14.0576	0.691207	-49.5489	34.3465	0.149174	-23.0067	45.3717	0.61212	-108.124	37.4523	0.00390197	27.2623	21.3282	0.201213		-20.4768	12.802	0.109793	-18.5326	11.7987	0.116329	-2.15558	8.42362	0.798045	-12.1256	18.9212	0.521661	-3.76641	18.0208	0.834457	-47.419	23.7078	0.0455559	110.086	43.2403	0.0109387
right postcentral gyrus	-28.5162	9.79816	0.00362175	-14.4713	8.98087	0.10715	-32.7006	9.6312	0.000689502	-39.901	23.5499	0.0902506	-7.89085	31.1115	0.799788	-54.1546	25.6882	0.0350544	16.0432	14.6251	0.272696		-24.2178	8.92847	0.00670949	-7.02921	8.23588	0.393443	-7.97763	5.87722	0.174741	-13.4135	13.2034	0.309738	-9.37236	12.5754	0.45614	-22.2898	16.5497	0.178114	61.054	30.1856	0.0431828
right precentral gyrus	-25.2839	12.4778	0.0427725	-30.3536	11.4296	0.00793292	-36.1322	12.2639	0.00322757	-32.2422	29.9846	0.282283	-30.5495	39.606	0.440535	-76.9972	32.7005	0.0185699	47.3414	18.6118	0.0109927		-40.8177	11.4436	0.000365755	-32.1636	10.5514	0.00231755	-13.2507	7.53689	0.0788093	-44.5342	16.9216	0.00852794	-25.2046	16.1252	0.118122	-41.883	21.2209	0.0484918	159.48	38.6503	3.76714e-05
right precuneus	-16.2038	12.9076	0.209388	-17.9191	11.8253	0.129737	-19.1054	12.6899	0.132226	-37.9188	31.0109	0.221464	-20.9063	40.9636	0.609814	-48.7584	33.8292	0.149542	60.151	19.2446	0.00178191		-24.0204	11.5548	0.037701	-19.378	10.6506	0.0689249	-0.400798	7.60482	0.957971	-10.5261	17.0819	0.537792	-15.1859	16.2672	0.350608	-19.4586	21.4121	0.363532	129.749	39.0133	0.000890207
right gyrus rectus	-12.5791	3.99649	0.00165369	-10.1325	3.66216	0.00567594	-8.10412	3.9309	0.0392796	1.50754	9.60858	0.875332	12.1125	12.6904	0.339882	-3.55054	10.4822	0.73483	27.6232	5.95709	3.60045e-06		-9.81164	3.59482	0.00637471	-9.52382	3.31272	0.00406376	-3.35196	2.36629	0.156699	-9.36062	5.31465	0.0782706	-6.93246	5.06233	0.170949	-18.2977	6.65838	0.00602318	45.353	12.1378	0.000189358
right subcallosal gyrus	-1.50057	2.51749	0.551156	-1.71325	2.3204	0.460331	-0.67724	2.48368	0.785111	-10.6077	6.03576	0.078882	3.50476	7.95043	0.659353	-7.05041	6.59282	0.284924	7.16302	3.74187	0.0556251		-5.17673	2.36035	0.0283531	-4.32666	2.18904	0.0481702	-0.67981	1.56421	0.663876	-1.33312	3.49217	0.702673	0.866366	3.32855	0.79466	-4.56184	4.38837	0.298625	13.2363	7.97994	0.0972605
right anterior transverse temporal gyrus	-6.06483	2.55548	0.0176594	0.523026	2.35524	0.824266	0.757345	2.52123	0.763891	-1.18269	6.13352	0.847103	2.56822	8.07921	0.750586	1.00254	6.69783	0.881021	5.3749	3.80273	0.157574		-5.03248	2.32768	0.0306796	-3.39568	2.14586	0.113634	-1.38468	1.53188	0.366099	-4.87444	3.44052	0.156631	-7.22422	3.27542	0.027473	-6.14502	4.31292	0.1543	32.0489	7.85372	4.58207e-05
right lateral aspect of the superior temporal gyrus	-33.5873	10.16	0.000951789	-25.2775	9.3109	0.00664767	4.12929	9.99694	0.679579	-21.254	24.4276	0.384287	7.88828	32.2661	0.80687	25.5154	26.6484	0.338356	57.7288	15.1531	0.000140359		-24.7015	9.33007	0.0081422	-12.6524	8.6043	0.141518	-5.29679	6.14219	0.388543	-21.8385	13.794	0.113463	-4.33731	13.1412	0.741377	-25.5412	17.2925	0.139756	169.674	31.4384	7.19106e-08
right planum polare of the superior temporal gyrus	-15.4749	4.84904	0.00142264	-6.73022	4.47065	0.132262	-2.31862	4.78623	0.628093	-1.54778	11.6407	0.894226	-4.98201	15.3322	0.745238	-5.37115	12.712	0.672655	29.8334	7.20852	3.53603e-05		-8.04293	4.41287	0.0684417	-6.39716	4.0905	0.117923	-3.15988	2.92059	0.279352	-3.42205	6.52743	0.600131	2.24934	6.22191	0.717732	-12.4241	8.19882	0.129765	56.098	14.8953	0.0001683
right planum temporale	-9.66438	4.85008	0.0463425	1.86168	4.44484	0.675346	0.33828	4.76989	0.943464	-3.2281	11.6557	0.781824	1.70426	15.3952	0.911857	4.87718	12.7154	0.701314	13.4544	7.23583	0.063011		-8.24099	4.41842	0.0622385	-3.12811	4.07367	0.442603	-2.58948	2.90737	0.373167	0.628671	6.53151	0.923326	-10.5006	6.2181	0.0913552	-8.87129	8.18645	0.278586	39.7527	14.9244	0.00776349
right inferior temporal gyrus	-38.9245	15.847	0.0140637	-56.0169	14.5095	0.000114109	-45.6817	15.5776	0.00337333	-32.7984	38.0875	0.389195	-53.5699	50.3053	0.286961	-70.2233	41.5441	0.0910107	122.56	23.6052	2.13966e-07		-27.9806	14.7074	0.0571842	-24.4164	13.5554	0.0717458	-24.5795	9.6706	0.011072	-19.4211	21.7393	0.371721	-0.951572	20.7061	0.963348	-13.6426	27.2537	0.616698	179.943	49.6396	0.000292786
right middle temporal gyrus	-52.098	16.3924	0.00148869	-32.9242	15.0245	0.0284586	-20.003	16.1268	0.214888	-31.5439	39.4104	0.423509	-16.531	52.0561	0.750827	-5.54456	42.9957	0.897396	132.737	24.4202	5.65278e-08		-40.6058	15.0505	0.00700746	-21.665	13.8797	0.118629	-20.2775	9.90393	0.0406861	-24.069	22.2561	0.279563	-15.9612	21.1978	0.451517	-32.8115	27.8988	0.239632	273.413	50.7161	7.43275e-08
right horizontal ramus of the anterior segment of the lateral sulcus	-5.42553	2.29735	0.0182217	-2.5933	2.10544	0.218098	-2.22168	2.25947	0.325506	-6.28735	5.52113	0.254835	1.67276	7.29309	0.818594	-6.58449	6.02319	0.274349	6.74658	3.42771	0.04908		-3.03075	2.17294	0.163168	-2.11183	2.00286	0.291764	-0.260674	1.42968	0.855333	-4.16864	3.21079	0.194256	-4.27012	3.05776	0.162649	-6.60133	4.02441	0.101022	4.58617	7.34469	0.53239
right vertical ramus of the anterior segment of the lateral sulcus	-1.63571	1.76351	0.353683	-2.52552	1.61553	0.118033	-0.470362	1.73395	0.786194	-0.919952	4.2371	0.828123	7.91621	5.59565	0.1572	-3.79176	4.62215	0.412048	1.48777	2.63098	0.571766		-2.07949	1.65299	0.208463	-1.31782	1.5236	0.38713	-0.130691	1.08753	0.904353	1.38316	2.44282	0.57128	-0.385124	2.32656	0.868533	-3.94711	3.0617	0.197412	9.25288	5.58522	0.0976688
right posterior ramus of the lateral sulcus	-2.09091	2.92915	0.475357	3.50372	2.68343	0.191703	2.32729	2.87985	0.419046	9.90342	7.03656	0.159348	10.1408	9.29457	0.275292	1.07901	7.67746	0.888236	1.22967	4.36997	0.778419		-8.16891	2.6526	0.0020878	-0.811889	2.44772	0.74014	-2.83962	1.7464	0.104035	-3.91804	3.92379	0.318084	-6.5676	3.73588	0.0788317	-10.153	4.91663	0.0389879	30.401	8.96175	0.000700196
right occipital pole	-18.3501	9.13023	0.0444899	-16.624	8.41633	0.0482853	-28.2758	9.00397	0.00169457	-23.9097	21.8966	0.274899	-0.906568	28.8376	0.974922	-9.87216	23.9162	0.679779	24.57	13.5727	0.0703016		-30.5554	8.41631	0.000286627	-20.2891	7.81249	0.00944044	-9.21404	5.58363	0.0989875	-29.0818	12.4571	0.0196186	-17.2684	11.8783	0.146092	-22.1337	15.6641	0.157732	86.7447	28.4594	0.00231949
right temporal pole	-20.0521	8.85335	0.0235494	-18.161	8.11144	0.0251926	-19.8175	8.7044	0.022834	-6.05291	21.2782	0.776062	-30.6489	28.1023	0.275479	-49.8021	23.2052	0.0318952	42.8169	13.2026	0.00118823		-20.6134	8.23946	0.0123987	-10.2936	7.5981	0.175576	-2.96841	5.42399	0.584223	-15.7263	12.1817	0.196791	-3.64155	11.6039	0.753675	-5.92049	15.2737	0.698315	87.3583	27.831	0.001709
right calcarine sulcus	-12.9463	8.17563	0.113348	-13.7956	7.48997	0.0655376	-25.0343	8.03388	0.0018403	-30.0637	19.6423	0.125925	41.5565	25.9435	0.109245	-19.0898	21.4307	0.373084	-1.28672	12.199	0.916		-21.15	7.42228	0.00440207	-17.8255	6.84174	0.0092124	-12.9364	4.88292	0.00809903	-25.4707	10.9709	0.0203037	-7.51626	10.4551	0.47224	-32.8858	13.7522	0.0168366	61.5586	25.0896	0.0141901
right central sulcus	-12.9449	5.90258	0.0283345	-6.41575	5.44213	0.238478	-15.3226	5.82248	0.00851684	-17.8101	14.1568	0.208412	-29.028	18.6419	0.119485	-22.4591	15.4607	0.146367	15.6621	8.77563	0.0743504		-8.36452	5.26245	0.112037	-6.81571	4.88026	0.16262	-1.84991	3.48625	0.595706	-3.49114	7.78355	0.653798	-0.134263	7.41904	0.985562	-3.59178	9.78216	0.713508	24.5825	17.7881	0.167064
right marginal branch of the cingulate sulcus	-9.85878	4.40541	0.0252613	-2.95039	4.03753	0.464962	-6.17295	4.33226	0.154238	-0.279664	10.5879	0.978928	5.1708	13.9846	0.711582	11.0817	11.5499	0.337361	-2.58392	6.57453	0.694318		-2.84617	4.01222	0.478134	2.09204	3.69784	0.5716	1.70647	2.63918	0.517937	-3.11583	5.92851	0.59922	5.81429	5.64556	0.303129	5.60481	7.43152	0.450779	7.99233	13.5591	0.555597
right anterior segment of the circular sulcus of the insula	-5.84594	2.29442	0.0108594	-7.04849	2.1014	0.000800339	-6.89275	2.25536	0.00225058	-9.82827	5.51372	0.0747103	-2.09173	7.28428	0.774002	-12.4665	6.01456	0.0382366	7.49699	3.42335	0.0285609		-5.10605	2.12372	0.0162514	-3.02391	1.95815	0.122607	-2.82812	1.39725	0.0430335	-3.78193	3.13974	0.228458	-1.09373	2.99072	0.714603	-5.18108	3.93573	0.188113	13.3065	7.17906	0.0638873
right inferior segment of the circular sulcus of the insula	-5.43544	3.17245	0.0866979	-2.59487	2.90703	0.372094	1.6277	3.1197	0.601862	0.0407862	7.62349	0.995731	11.772	10.0683	0.242357	3.70501	8.31653	0.655973	6.4944	4.73316	0.170076		-4.52405	2.97713	0.128695	2.68507	2.74428	0.327927	0.600106	1.95887	0.759352	-2.1669	4.40012	0.622421	-3.13944	4.19037	0.453781	-4.47852	5.51556	0.416854	24.7777	10.0559	0.0137836
right superior segment of the circular sulcus of the insula	-4.18845	3.78683	0.268741	-4.35983	3.46937	0.20892	-4.93318	3.72299	0.185196	-15.571	9.09676	0.0869964	3.65026	12.0177	0.761335	-9.97602	9.92528	0.314879	13.1049	5.64763	0.0203472		-7.04136	3.54372	0.0469945	-1.23945	3.26761	0.704475	-1.63951	2.33204	0.482076	-2.17382	5.2387	0.678199	-3.21909	4.98903	0.518814	-5.57546	6.5666	0.395899	45.7842	11.9587	0.000130998
right anterior transverse collateral sulcus	-14.607	4.39219	0.000886724	-11.0891	4.02512	0.00588537	-13.1485	4.31888	0.00234024	-4.21733	10.5607	0.689654	-10.1214	13.9484	0.468091	0.255844	11.5211	0.982284	21.5778	6.55257	0.000996216		-10.79	4.10573	0.00862263	-8.71338	3.78474	0.0213756	-5.88259	2.70143	0.0294988	-11.8242	6.06899	0.0514532	1.12706	5.7828	0.845483	-12.6708	7.60893	0.0959453	42.5871	13.8702	0.0021529
right posterior transverse collateral sulcus	-2.31291	2.01214	0.250401	-0.698095	1.84367	0.704964	-3.02425	1.97815	0.126354	-6.4841	4.83403	0.179853	-5.73098	6.38535	0.369473	-1.28017	5.27423	0.808228	1.50458	3.00204	0.616255		-2.33228	1.82082	0.200309	-2.59018	1.67795	0.122754	-2.58836	1.19722	0.0306828	-7.61938	2.68813	0.00461478	-5.68677	2.56114	0.0264505	-8.59759	3.37043	0.0107841	15.0626	6.14971	0.0143574
right inferior frontal sulcus	-29.988	9.6554	0.0019053	-12.7922	8.90113	0.150723	-14.5995	9.52802	0.125502	-24.8957	23.1773	0.282798	-9.61736	30.5308	0.752767	21.6776	25.3111	0.391781	28.3483	14.3683	0.048539		-20.3193	8.78022	0.0207093	-14.7054	8.09424	0.0693317	-8.20265	5.77798	0.155795	1.31807	12.9825	0.919138	5.31257	12.3639	0.66745	-2.58862	16.2745	0.87363	-0.224166	29.6926	0.993977
right middle frontal sulcus	-13.4704	11.4653	0.240081	-4.53309	10.5053	0.666116	-12.4722	11.2726	0.268585	-19.1102	27.5473	0.48788	8.1707	36.3862	0.822332	8.21164	30.053	0.784678	18.0474	17.1048	0.291413		-21.9459	10.2936	0.0330705	-12.3079	9.49036	0.19475	-0.2721	6.77493	0.967965	5.06395	15.2183	0.739339	15.0459	14.4917	0.299221	-33.9478	19.0696	0.0751226	71.4157	34.7873	0.0401485
right superior frontal sulcus	-19.1677	12.5521	0.126793	-13.411	11.5683	0.24638	-2.33879	12.3837	0.850209	-39.7807	30.1077	0.186452	46.5978	39.6547	0.240001	6.373	32.8842	0.846337	19.8826	18.6682	0.286888		-19.6086	11.697	0.0937464	-2.37099	10.7842	0.825993	-9.18408	7.69544	0.232771	17.5402	17.2872	0.310345	24.3549	16.4613	0.139085	-14.4202	21.6724	0.505854	93.2189	39.5142	0.0183687
right sulcus intermedius primus	-1.40464	2.99739	0.639354	-2.95543	2.74599	0.281844	-2.46523	2.94687	0.402869	-4.84112	7.20114	0.501434	-8.86711	9.51112	0.35122	-7.70547	7.85561	0.326683	7.34457	4.47082	0.100475		-3.92257	2.77508	0.157592	-0.680747	2.55823	0.790176	-1.34676	1.82574	0.460772	-1.22454	4.10141	0.765288	-4.40771	3.90545	0.259136	-3.36284	5.14117	0.513087	21.071	9.37426	0.0246494
right intraparietal sulcus and transverse parietal sulci	-6.35598	12.7065	0.616941	-16.2709	11.7062	0.164594	0.405039	12.5326	0.974219	-59.8587	30.4739	0.0495407	-17.3658	40.1498	0.665374	-38.0837	33.285	0.252593	17.2589	18.8996	0.361176		-23.2946	11.3867	0.0408478	12.7083	10.498	0.226147	-1.29554	7.49402	0.862757	10.9823	16.833	0.514165	4.47384	16.032	0.780216	3.54714	21.1024	0.86652	81.1195	38.4786	0.0350817
right middle occipital sulcus and lunatus sulcus	-6.97074	4.23785	0.100041	-2.22309	3.88336	0.567026	-10.1949	4.16557	0.0144135	1.19437	10.1835	0.906638	4.72344	13.4505	0.725469	-0.220941	11.1094	0.984134	10.8456	6.3221	0.0862987		-12.9753	3.88641	0.000850041	-7.21346	3.58515	0.0442867	-3.95013	2.55934	0.122814	-14.952	5.74575	0.00929716	-4.32993	5.47652	0.429207	-10.8916	7.20695	0.130805	33.0387	13.142	0.0119786
right superior occipital sulcus and transverse occipital sulcus	-12.526	5.54315	0.0238697	-10.1225	5.07901	0.0463003	-17.5986	5.44778	0.00124197	-14.6203	13.3213	0.272455	3.4223	17.5965	0.8458	5.01092	14.5337	0.73027	10.9289	8.27155	0.186457		-13.882	4.98612	0.00539403	-3.45693	4.59968	0.452363	-4.5455	3.28228	0.166177	-18.8428	7.36852	0.0105904	2.35003	7.02351	0.737949	-7.84505	9.24404	0.396124	26.3874	16.8617	0.117683
right anterior occipital sulcus and preoccipital notch	-4.55947	4.10176	0.266355	-6.56666	3.7575	0.0805762	-3.26422	4.03294	0.418319	-3.57747	9.85533	0.716617	4.64664	13.0171	0.72113	12.4172	10.7505	0.248114	17.6326	6.11602	0.00395117		-10.7865	3.83292	0.00491553	-0.480344	3.53619	0.891958	-2.81939	2.52343	0.263944	-3.342	5.66907	0.555551	9.79015	5.39696	0.0697551	3.78061	7.10663	0.594769	44.4833	12.9463	0.000596738
right lateral occipito-temporal sulcus	-7.86819	4.61935	0.0885552	-3.71999	4.23287	0.379522	0.672179	4.54261	0.882369	5.10786	11.1002	0.645417	3.76459	14.6616	0.797367	5.14736	12.1095	0.670802	18.8288	6.88904	0.00628922		-6.92689	4.31897	0.108835	1.93457	3.98169	0.62709	-1.76756	2.84174	0.533979	6.76573	6.3828	0.289215	9.00609	6.07794	0.138485	-0.80424	8.00246	0.919953	38.0019	14.5873	0.00921976
right medial occipito-temporal sulcus and lingual sulcus	-12.529	5.82519	0.0315246	-8.30424	5.36884	0.121971	-11.722	5.74608	0.0413895	-8.02548	13.9772	0.565862	-2.35633	18.4095	0.898157	-1.92869	15.2643	0.899456	33.2453	8.65719	0.00012405		-13.2065	5.35464	0.0136931	-6.1996	4.96669	0.212022	-3.88526	3.54629	0.273331	-7.7016	7.92264	0.331063	-6.75063	7.55168	0.371419	-15.8665	9.95259	0.110973	57.9112	18.0894	0.00137903
right lateral orbital sulcus	-6.12081	2.35581	0.00939214	-2.8289	2.15917	0.190179	-1.81569	2.31722	0.433325	-12.1815	5.66073	0.031438	-13.6863	7.47751	0.0672449	4.12886	6.17733	0.503908	8.58834	3.5147	0.0145687		-3.31921	2.18536	0.128886	0.418887	2.01468	0.835304	-1.53415	1.4377	0.286001	-2.10395	3.22982	0.514819	-3.02943	3.07577	0.32472	-3.0378	4.04873	0.453115	15.2452	7.38323	0.0390064
right medial orbital sulcus	-3.80993	2.26948	0.0932432	-4.36758	2.09154	0.0368155	-3.88781	2.23889	0.0825224	-5.68085	5.44321	0.29668	-0.819886	7.16908	0.908952	-1.97637	5.94507	0.739568	10.2336	3.37271	0.00242046		-5.36491	2.10093	0.0107009	-1.40867	1.94975	0.470038	-0.410501	1.39259	0.768182	-0.674127	3.10908	0.828356	3.84453	2.96271	0.194491	0.399125	3.90739	0.918646	18.4063	7.10083	0.00957494
right orbital sulci	-15.47	4.70159	0.00100563	-7.64878	4.33614	0.0777834	-6.59551	4.64143	0.155361	-10.5678	11.282	0.348951	4.73365	14.8583	0.75005	4.13593	12.3222	0.737146	18.082	6.99149	0.00972207		-8.38423	4.29754	0.0511382	-2.39502	3.98738	0.54811	0.865883	2.8482	0.761137	-4.58055	6.35713	0.471238	2.71936	6.05939	0.653613	-11.1784	7.98859	0.161806	23.4732	14.5273	0.106222
right parieto-occipital sulcus	-22.0761	8.33121	0.0080724	-17.4738	7.63399	0.0221133	-14.9912	8.19329	0.0673393	-37.9383	20.0209	0.0581429	2.69321	26.4509	0.918903	-8.29359	21.8468	0.704236	21.7021	12.4325	0.0809267		-26.2382	7.7012	0.000663608	-14.5009	7.10456	0.0413134	-13.0611	5.06899	0.0100137	-24.3192	11.3896	0.0328079	-20.36	10.8486	0.0606311	-37.0648	14.2736	0.00944767	92.6181	26.0216	0.000376445
right pericallosal sulcus	-9.42221	4.90755	0.0549069	-4.46639	4.49715	0.320667	4.48554	4.826	0.352687	-17.3113	11.7918	0.142127	-14.1772	15.5763	0.362762	-0.868596	12.866	0.946177	23.9783	7.31751	0.00105501		-5.35019	4.6325	0.248194	1.79888	4.27007	0.673577	1.36808	3.04761	0.653528	9.86763	6.84418	0.149454	-1.5947	6.51993	0.806788	-5.3397	8.58157	0.533829	13.2952	15.6562	0.395825
right postcentral sulcus	-21.3022	9.95585	0.0324176	-1.65042	9.17789	0.857294	-11.9655	9.82291	0.22322	-18.7156	23.8864	0.433346	-10.112	31.4609	0.747907	-41.0465	26.0824	0.115598	19.746	14.8087	0.182442		-30.4481	8.98846	0.000712621	-3.80316	8.34384	0.648557	-9.68674	5.9548	0.103882	4.5708	13.3103	0.731314	1.64897	12.6871	0.896595	-2.58277	16.7237	0.877272	87.4755	30.395	0.00402511
right inferior part of the precentral sulcus	-12.5862	8.09028	0.119822	-4.86448	7.41334	0.511731	-19.7973	7.95201	0.0128123	10.6678	19.44	0.583192	7.2728	25.6772	0.777002	-24.9026	21.2059	0.240308	7.71565	12.0712	0.522729		-14.0055	7.2788	0.0544114	-13.7039	6.70789	0.0411262	-0.405897	4.79017	0.932476	-10.2552	10.7589	0.340557	1.04102	10.2477	0.919091	-19.4727	13.4849	0.148812	11.2596	24.6091	0.64731
right superior part of the precentral sulcus	-8.67389	6.17647	0.160262	-11.437	5.69159	0.0445285	-0.474833	6.09386	0.937894	-23.2339	14.8124	0.116803	-21.9179	19.5098	0.261296	-9.73948	16.1793	0.547213	15.5041	9.18342	0.091406		-12.9344	5.77904	0.0252688	-9.89571	5.35889	0.0648839	-3.1002	3.82793	0.418054	-7.47974	8.54963	0.381706	-5.05302	8.1496	0.535273	-20.6017	10.7395	0.0551476	51.1252	19.5289	0.0088818
right suborbital sulcus	-6.52317	2.13381	0.00224388	-3.98246	1.95572	0.0417579	-7.6562	2.09731	0.000263702	-3.80197	5.1298	0.458627	5.02102	6.77555	0.458689	-8.88073	5.59542	0.112527	8.79575	3.18371	0.00574728		-0.994668	2.0161	0.621786	-3.31166	1.85737	0.074669	-2.71498	1.32546	0.040596	-2.54099	2.97875	0.393691	-3.4507	2.83659	0.223872	-9.30892	3.73136	0.0126459	19.1731	6.80626	0.00487299
right subparietal sulcus	-4.4681	6.06919	0.461638	-9.72649	5.55952	0.0802465	-7.31086	5.96669	0.220513	-16.01	14.5806	0.272228	-22.8863	19.2581	0.234718	-12.7667	15.907	0.422245	20.5362	9.05123	0.0233062		-6.01742	5.57495	0.280493	-6.12633	5.13783	0.233181	0.461987	3.66764	0.899768	-12.3435	8.23622	0.134038	-8.57825	7.84502	0.27426	8.41694	10.3268	0.415092	45.3921	18.8283	0.0159632
right inferior temporal sulcus	-5.86315	4.39929	0.182659	-9.95741	4.05218	0.0140234	-8.63132	4.33829	0.0466789	-18.6041	10.5525	0.0779445	-24.431	13.8993	0.0788411	-0.299289	11.5264	0.979285	34.5286	6.53108	1.28335e-07		-5.82486	4.16464	0.162001	-3.31844	3.83884	0.387403	-4.51859	2.73913	0.0990996	-6.015	6.15436	0.328455	5.36229	5.86133	0.360324	-1.44555	7.71586	0.851398	40.5459	14.0621	0.00395697
right superior temporal sulcus	-95.1398	21.0739	6.45096e-06	-45.468	19.4429	0.0193879	-43.7974	20.8128	0.035385	-91.8659	50.6073	0.0695263	-26.1662	66.6666	0.694706	5.83545	55.2813	0.915935	169.931	31.3159	5.94949e-08		-55.161	19.4459	0.0045834	-41.4711	18.0331	0.021518	-34.0549	12.8725	0.00818971	-12.5176	28.7827	0.663659	2.38289	27.4354	0.930792	-67.3159	36.1502	0.0626643	294.195	65.624	7.57692e-06
right transverse temporal sulcus	-2.51902	1.38816	0.0696231	1.31572	1.27203	0.30101	-0.606191	1.36512	0.657017	-0.044463	3.33588	0.989366	-0.278009	4.4061	0.949692	1.77913	3.63914	0.624936	2.87445	2.07113	0.165223		-0.872438	1.25197	0.485938	-1.44186	1.15368	0.211453	-0.392825	0.823547	0.633395	-2.41751	1.84958	0.191271	-1.20705	1.76177	0.493302	-1.35438	2.31899	0.559228	8.82883	4.22871	0.03688
left-thalamus-proper	-14.1476	8.8175	0.108652	-20.6707	8.12027	0.0109319	-12.0003	8.69574	0.167626	-36.5175	21.1551	0.0843605	16.1846	27.8726	0.561486	-63.3767	23.0934	0.00607868	52.0347	13.1059	7.25105e-05		-27.4519	8.50137	0.00125235	-12.1611	7.8887	0.123257	-6.22143	5.63298	0.269462	-9.80532	12.5862	0.435999	12.5968	11.9961	0.293751	-27.0962	15.8093	0.0866219	100.521	28.7281	0.00047229
left-caudate	-12.0115	5.69019	0.0348156	-13.2255	5.21255	0.0111949	-9.80749	5.59505	0.0796664	-6.67638	13.675	0.625411	-4.99833	18.0624	0.781999	-28.1126	14.9147	0.0594874	35.559	8.48072	2.78872e-05		-5.66548	5.24004	0.279682	-6.82972	4.82882	0.157336	-1.56685	3.44722	0.649476	5.48253	7.74322	0.478962	6.99638	7.37403	0.34279	-0.679022	9.70729	0.944237	57.1795	17.6864	0.00123568
left-putamen	-16.2136	6.67312	0.0151372	-21.3502	6.11104	0.000479382	-21.6597	6.55848	0.000963017	-9.80969	16.0388	0.540807	18.3062	21.1837	0.38753	-16.0105	17.4965	0.360187	35.5871	9.95024	0.000350629		-17.8586	6.25595	0.00433186	-17.2461	5.76502	0.00279397	-18.3109	4.1087	8.56787e-06	-13.3155	9.251	0.150132	8.07381	8.81182	0.359596	-1.84165	11.5999	0.873863	91.2986	21.1119	1.56813e-05
left-pallidum	-4.62975	2.88197	0.108221	-6.79455	2.65565	0.0105333	-6.07774	2.84283	0.0325586	-1.84715	6.91216	0.789298	8.14301	9.10234	0.371029	-7.67869	7.54846	0.309069	14.5323	4.28172	0.000692612		-5.3102	2.56947	0.038835	-2.94637	2.38397	0.21657	-2.85086	1.70266	0.0941438	-2.91452	3.80113	0.443277	5.90968	3.62198	0.102844	-5.21581	4.77719	0.274984	27.5889	8.67743	0.00148778
left-hippocampus	-3.89081	4.51409	0.38876	-3.44125	4.1358	0.405402	-3.18283	4.43824	0.473313	-8.0454	10.8453	0.458215	-3.90324	14.3252	0.785266	0.762255	11.8319	0.948635	30.2469	6.72473	6.9777e-06		-14.7754	4.33484	0.000659967	-1.89548	4.00108	0.635712	-5.72039	2.85422	0.0451208	-14.5866	6.41046	0.0229352	-1.31128	6.10927	0.830061	-9.88105	8.03984	0.219144	49.703	14.6492	0.000698753
left-amygdala	-3.47512	2.49381	0.163515	-6.72435	2.29771	0.0034389	-4.61604	2.46014	0.0606517	-8.52559	5.97907	0.153941	-4.56088	7.87452	0.562477	-11.4214	6.52961	0.0803075	13.1503	3.70382	0.000387157		-4.47113	2.39141	0.0616074	-2.22617	2.21889	0.315789	-1.92081	1.58509	0.225666	-8.80747	3.53471	0.0127555	-1.12601	3.37168	0.738427	-5.9862	4.44553	0.1782	35.9207	8.06471	8.66966e-06
right-thalamus-proper	-16.1355	7.9334	0.0420037	-9.23876	7.30983	0.206315	-13.3137	7.82441	0.0888844	-22.0153	19.038	0.247562	8.30954	25.0802	0.740414	-47.8265	20.7833	0.0214105	61.4494	11.7828	1.89042e-07		-20.2412	7.67847	0.00842088	-6.7154	7.12323	0.345871	-2.11518	5.08605	0.677522	-12.7218	11.3618	0.262913	17.9096	10.8279	0.0982052	-14.7652	14.2761	0.30108	109.007	25.917	2.65967e-05
right-caudate	-12.0631	5.66078	0.033125	-11.671	5.18617	0.0244542	-7.69416	5.56664	0.166958	-3.44349	13.6046	0.800189	0.0813303	17.9693	0.996389	-23.2226	14.839	0.117635	38.4169	8.435	5.34322e-06		-5.74587	5.24482	0.273354	-4.3272	4.83401	0.370759	-1.20651	3.45042	0.726606	6.81459	7.75004	0.379296	8.60742	7.38034	0.243582	-0.685281	9.71619	0.943776	56.4062	17.7033	0.00145334
right-putamen	-22.3872	6.57164	0.000661483	-25.6022	6.01803	2.12561e-05	-25.0832	6.45947	0.000104083	-14.9956	15.8008	0.342634	17.2917	20.8704	0.4074	-19.2107	17.2371	0.265105	37.8056	9.80152	0.000115793		-20.3629	6.21747	0.00106576	-17.4151	5.73129	0.00239303	-16.8483	4.08635	3.81889e-05	-15.7242	9.19619	0.0873737	6.39502	8.76095	0.465469	-5.15956	11.5322	0.654609	87.4176	20.9929	3.19487e-05
right-pallidum	-2.40608	2.7518	0.38195	-4.59687	2.53481	0.0697995	-3.82332	2.71369	0.15891	-2.1415	6.60207	0.74567	8.26118	8.69577	0.342135	-5.37138	7.20933	0.456262	14.9151	4.08979	0.000267398		-4.10901	2.4678	0.0959857	-4.76196	2.2739	0.0363102	-4.5695	1.62216	0.00487382	0.782808	3.64766	0.830086	10.6159	3.46967	0.00223171	-1.46127	4.57256	0.749309	20.2215	8.3362	0.0153234
right-hippocampus	-4.45986	4.76612	0.349439	-5.35664	4.39071	0.222509	-8.04033	4.69968	0.0871591	-11.8191	11.4345	0.301344	-8.04965	15.0626	0.593073	8.00531	12.4871	0.521488	31.241	7.08075	1.0395e-05		-10.2323	4.51515	0.0234945	-1.99359	4.16395	0.632128	-3.66847	2.97138	0.217056	-9.27822	6.67426	0.164565	3.98418	6.35767	0.530911	-8.01463	8.36777	0.338226	43.9077	15.252	0.00401416
right-amygdala	-2.46568	2.47182	0.31855	-4.69469	2.27677	0.0392462	-3.21714	2.43766	0.186958	-5.37581	5.93017	0.364694	9.24139	7.81091	0.236796	-3.49532	6.47607	0.589402	15.3685	3.67268	2.89316e-05		-7.73448	2.32531	0.000888732	-4.22954	2.14508	0.0487126	-2.4224	1.53126	0.113742	-6.55312	3.43917	0.0567993	-1.38193	3.27686	0.673251	-4.84977	4.31258	0.260846	29.1918	7.85525	0.000205149
Notes. β indicates the coefficient in the linear mixed-effects model, se is the standard error, p is significance, and the p-values that survived the FDR correction (correcting for each activity independently) are bolded
Abbreviation. TVM = watching television shows/ movies; Video: watching videos; Game = playing video games; Text = texting on a cell phone, tablet and so on; SNS = visiting social networking sites; VC = video chatting.

## Sheet: STable3
Supplementary Table 3. The causalities in the two-direction Mendelian randomization analyses between screen use or reading and brain volume
Exposure	Outcome (Brain volume)	Forward Mendelian randomization							Reverse Mendelian randomization
		β	se	p	FDR corrected p	Weak IV test	Sargan Test		β	se	p	FDR corrected p	Weak IV test	Sargan Test
TVM	left anterior part of the cingulate gyrus and sulcus	-28.8476	29.5751	0.329402	0.468497	18.0898	0.683568		-4.07e-05	4.09e-05	0.31999	0.551867	19.7262	0.683591
TVM	left middle frontal gyrus	-78.9359	76.4161	0.301659	0.440443	18.0898	0.402463		1.52e-05	1.9e-05	0.424607	0.608774	18.4561	0.165658
TVM	left superior frontal gyrus	-181.731	104.102	0.0809162	0.171947	18.0898	0.291851		-5.4e-06	1.08e-05	0.616366	0.748444	17.7588	0.058732
TVM	left long insular gyrus and central sulcus of the insula	3.85519	9.28926	0.678146	0.775956	18.0898	0.620984		-0.000131257	0.000136432	0.336055	0.555424	18.0241	0.567035
TVM	left superior occipital gyrus	-19.6607	20.2108	0.330704	0.468497	18.0898	0.271589		-1.08e-05	6.8e-05	0.873465	0.928057	18.3817	0.449212
TVM	left orbital gyri	18.5126	33.3936	0.579342	0.689418	18.0898	0.43835		-3e-05	3.45e-05	0.385118	0.583701	18.5591	0.0703052
TVM	left precentral gyrus	-40.7724	38.6004	0.29089	0.432699	18.0898	0.0962144		-8.34e-05	3.35e-05	0.0126877	0.100656	19.4809	0.649656
TVM	left lateral aspect of the superior temporal gyrus	-75.124	40.0574	0.0607875	0.141837	18.0898	0.768266		-0.000102821	3.1e-05	0.000932243	0.0221874	18.7269	0.0411113
TVM	left middle temporal gyrus	-36.5118	53.9069	0.498235	0.611237	18.0898	0.882764		-3.51e-05	2.72e-05	0.197659	0.403507	18.0083	0.0167083
TVM	left central sulcus	-17.7011	19.5283	0.364744	0.500947	18.0898	0.650803		2.39e-05	5.81e-05	0.680584	0.798912	17.3488	0.690933
TVM	left orbital sulci	-16.0891	14.9549	0.282045	0.430299	18.0898	0.256895		-7.8e-05	9.12e-05	0.392404	0.583701	17.5104	0.884317
TVM	left parieto-occipital sulcus	-8.93131	27.3241	0.743782	0.803893	18.0898	0.495843		-5.71e-06	4.99e-05	0.908907	0.939129	19.9426	0.684461
TVM	left superior part of the precentral sulcus	-15.7912	19.3266	0.41392	0.52964	18.0898	0.51898		-0.000148748	7.7e-05	0.0535736	0.205653	18.3246	0.148924
TVM	left superior temporal sulcus	5.52212	68.2335	0.935501	0.943429	18.0898	0.275078		-4.14e-05	1.89e-05	0.0286524	0.142068	18.4673	0.0184809
TVM	right subcentral gyrus and sulci	4.59173	24.0854	0.848811	0.878335	18.0898	0.534757		-9.96e-05	5.47e-05	0.0688291	0.234019	19.039	0.810707
TVM	right anterior part of the cingulate gyrus and sulcus	-14.4641	34.4289	0.674419	0.775956	18.0898	0.549193		-2.42e-05	3.68e-05	0.511181	0.675895	19.6121	0.130318
TVM	right middle-anterior part of the cingulate gyrus and sulcus	-7.05799	20.9595	0.736322	0.803875	18.0898	0.66637		-0.000129709	6.63e-05	0.0505426	0.205653	19.0499	0.879867
TVM	right middle-posterior part of the cingulate gyrus and sulcus	-20.3833	19.8078	0.303499	0.440443	18.0898	0.902784		-8.23e-05	6.15e-05	0.181062	0.393174	17.8523	0.153929
TVM	right long insular gyrus and central sulcus of the insula	2.67007	9.94725	0.788383	0.830244	18.0898	0.610399		-0.000187102	0.00014909	0.209545	0.408784	17.6346	0.209727
TVM	right short insular gyri	-12.6222	13.7173	0.357527	0.500537	18.0898	0.899848		-0.000169408	9.46e-05	0.0732874	0.235708	17.9956	0.11683
TVM	right superior occipital gyrus	0.443538	24.7446	0.9857	0.9857	18.0898	0.391218		-2.85e-06	5.11e-05	0.955458	0.963556	19.48	0.433453
TVM	right orbital gyri	-4.96969	38.0588	0.896113	0.911431	18.0898	0.764223		-8.26e-05	3.39e-05	0.0149829	0.10488	18.1713	0.452124
TVM	right postcentral gyrus	-9.27853	32.1465	0.772873	0.821178	18.0898	0.0702447		2.26e-05	3.88e-05	0.560195	0.71602	19.098	0.206751
TVM	right gyrus rectus	-7.16911	13.3313	0.590761	0.696045	18.0898	0.449695		-1.31e-05	9.45e-05	0.889662	0.936901	17.9634	0.191791
TVM	right lateral aspect of the superior temporal gyrus	-63.6917	33.3634	0.0563082	0.136749	18.0898	0.364372		-4.93e-05	3.87e-05	0.202485	0.403507	19.4115	0.0385925
TVM	right middle temporal gyrus	-45.9632	54.4151	0.398326	0.526676	18.0898	0.977114		-6.17e-05	2.34e-05	0.008493	0.0782916	17.0765	0.317284
TVM	right anterior segment of the circular sulcus of the insula	3.81102	7.7749	0.624033	0.728038	18.0898	0.214259		0.000298618	0.000185753	0.107977	0.313209	18.4189	0.456609
TVM	right anterior transverse collateral sulcus	-17.6712	14.6021	0.226261	0.380285	18.0898	0.349593		-9.46e-05	0.000101273	0.350443	0.566036	18.6899	0.0018467
TVM	right inferior frontal sulcus	-34.9945	31.0206	0.259323	0.41702	18.0898	0.702349		1.31e-05	4.61e-05	0.776464	0.863544	17.8974	0.18044
TVM	right parieto-occipital sulcus	8.94314	28.0478	0.74985	0.803893	18.0898	0.259874		-1.92e-05	4.74e-05	0.684782	0.798912	19.4534	0.15466
TVM	right superior temporal sulcus	-23.7604	70.4894	0.736071	0.803875	18.0898	0.458115		-3.65e-05	1.65e-05	0.0265852	0.142068	18.0752	0.164875
TVM	right-putamen	-17.7511	21.6419	0.412126	0.52964	18.0898	0.56026		-0.000112076	4.66e-05	0.0161011	0.106446	17.2339	0.249978
Game	left-putamen	-48.1081	19.7075	0.0146723	0.056254	18.3283	0.301319		-48.1081	19.7075	0.0146723	0.10488	18.3283	0.301319
Game	right-putamen	-56.3721	19.3727	0.00362975	0.028796	18.3283	0.0420975		-56.3721	19.3727	0.00362975	0.0541832	18.3283	0.0420975
Reading	left subcentral gyrus and sulci	73.8143	25.9008	0.00438999	0.0326506	16.1246	0.642395		5.76238e-05	3.51359e-05	0.101058	0.308355	18.519	0.826722
Reading	left transverse frontopolar gyri and sulci	5.52158	14.3934	0.701276	0.787281	16.1246	0.854537		0.000145287	7.83925e-05	0.0638892	0.223612	16.9003	0.634532
Reading	left anterior part of the cingulate gyrus and sulcus	67.5192	29.6354	0.0227456	0.0776002	16.1246	0.398436		-1.69217e-05	2.94503e-05	0.565596	0.71602	18.2395	0.4485
Reading	left middle-anterior part of the cingulate gyrus and sulcus	2.7797	20.203	0.890571	0.911431	16.1246	0.322248		4.59829e-05	4.98912e-05	0.356746	0.566036	17.801	0.332348
Reading	left middle-posterior part of the cingulate gyrus and sulcus	11.44	18.1293	0.528055	0.641209	16.1246	0.934282		7.15626e-05	6.18224e-05	0.247099	0.466742	18.6765	0.0986745
Reading	left posterior-dorsal part of the cingulate gyrus	41.7788	14.9636	0.00525624	0.0367937	16.1246	0.00218087		5.62163e-05	6.08893e-05	0.355916	0.566036	16.9976	0.54121
Reading	left middle frontal gyrus	251.537	77.0376	0.00110098	0.0227249	16.1246	0.773872		9.75629e-06	1.32928e-05	0.463008	0.640674	17.9247	0.291819
Reading	left superior frontal gyrus	116.436	105	0.267516	0.42446	16.1246	0.323387		-3.75631e-06	7.64193e-06	0.623065	0.748937	16.757	0.0832333
Reading	left long insular gyrus and central sulcus of the insula	11.6985	9.30227	0.208593	0.365037	16.1246	0.095496		0.000138527	9.69759e-05	0.153216	0.387929	16.997	0.125283
Reading	left short insular gyri	29.0798	13.5826	0.0323219	0.0986231	16.1246	0.133471		9.4965e-05	7.03776e-05	0.177276	0.393174	17.9855	0.698644
Reading	left middle occipital gyrus	87.6444	41.5871	0.0351213	0.104486	16.1246	0.179152		6.37228e-05	2.19066e-05	0.00364257	0.0541832	18.3665	0.078112
Reading	left lateral occipito-temporal gyrus	102.388	35.0594	0.00351017	0.028796	16.1246	0.177201		-2.28479e-05	2.6346e-05	0.385856	0.583701	17.8054	0.0146536
Reading	left parahippocampal gyrus	42.0652	33.4248	0.208265	0.365037	16.1246	0.0139568		-1.06596e-06	2.64754e-05	0.967886	0.967886	18.5574	0.0248583
Reading	left orbital gyri	87.7589	33.4899	0.0088057	0.0449564	16.1246	0.076154		5.07064e-05	2.45122e-05	0.0386296	0.183877	17.5323	0.275152
Reading	left angular gyrus	80.8215	53.6149	0.131755	0.256235	16.1246	0.100014		4.10276e-05	1.81552e-05	0.0238717	0.140444	18.0243	0.0288064
Reading	left supramarginal gyrus	124.431	67.2691	0.0644042	0.144233	16.1246	0.250336		2.21201e-05	1.39297e-05	0.112349	0.313209	18.8966	0.210794
Reading	left gyrus rectus	6.02637	15.577	0.698863	0.787281	16.1246	0.607481		5.60992e-05	6.20626e-05	0.366082	0.573207	13.6061	0.0526442
Reading	left subcallosal gyrus	28.2386	11.47	0.0138493	0.056254	16.1246	0.213518		7.82185e-05	7.59367e-05	0.303033	0.530308	17.6905	0.267586
Reading	left anterior transverse temporal gyrus	39.782	12.0418	0.000960537	0.0227249	16.1246	0.146062		0.000201934	7.55703e-05	0.00755964	0.0782916	20.4794	0.327385
Reading	left lateral aspect of the superior temporal gyrus	77.4328	40.4358	0.0555512	0.136749	16.1246	0.00851495		4.00555e-05	2.15855e-05	0.0635553	0.223612	18.3355	0.176106
Reading	left planum polare of the superior temporal gyrus	24.8049	16.029	0.121801	0.241572	16.1246	0.119428		7.27111e-05	5.44386e-05	0.181719	0.393174	17.6177	0.0782802
Reading	left planum temporale	61.8887	23.7079	0.00906684	0.0449564	16.1246	0.548725		2.33174e-05	4.47176e-05	0.602083	0.746332	18.3887	0.0736379
Reading	left inferior temporal gyrus	82.8735	58.1508	0.154172	0.286664	16.1246	0.337853		-1.22326e-05	1.91131e-05	0.522192	0.682867	17.9891	0.0952717
Reading	left middle temporal gyrus	42.6803	54.4277	0.432977	0.542361	16.1246	0.653624		2.58692e-05	1.87576e-05	0.167912	0.393174	18.0548	0.828631
Reading	left temporal pole	76.2773	28.7043	0.00789898	0.0447609	16.1246	0.578183		7.74647e-05	3.38759e-05	0.0222506	0.139359	17.6722	0.359846
Reading	left anterior segment of the circular sulcus of the insula	18.3539	7.52327	0.0147351	0.056254	16.1246	0.860989		1.3878e-05	0.000130719	0.915454	0.939129	18.0198	0.269034
Reading	left inferior segment of the circular sulcus of the insula	28.0151	13.476	0.0376748	0.106745	16.1246	0.517671		0.000195313	6.35455e-05	0.00212559	0.0421576	18.0716	0.576605
Reading	left superior segment of the circular sulcus of the insula	36.0459	13.4207	0.00725669	0.0431773	16.1246	0.499748		6.95121e-05	7.17259e-05	0.332521	0.555424	18.0586	0.581292
Reading	left anterior transverse collateral sulcus	27.6766	14.3355	0.0535802	0.135661	16.1246	0.0951962		4.72665e-05	7.10464e-05	0.505893	0.675895	17.3911	0.771931
Reading	left superior frontal sulcus	64.45	42.9476	0.133501	0.256235	16.1246	0.31504		1.29296e-05	2.3435e-05	0.581162	0.727982	17.7916	0.115672
Reading	left sulcus intermedius primus	11.7546	10.9197	0.281772	0.430299	16.1246	0.0401106		-6.15449e-05	0.000101256	0.543334	0.702791	19.3137	0.0521107
Reading	left middle occipital sulcus and lunatus sulcus	13.1617	14.6933	0.370422	0.500947	16.1246	0.391492		-8.44134e-06	7.6554e-05	0.912202	0.939129	19.1239	0.385487
Reading	left anterior occipital sulcus and preoccipital notch	41.7434	15.2475	0.00620691	0.0388749	16.1246	0.187189		0.000111495	8.25708e-05	0.176979	0.393174	19.0193	0.813501
Reading	left lateral occipito-temporal sulcus	23.1668	14.2983	0.105238	0.212259	16.1246	0.636883		5.80769e-05	8.43272e-05	0.491036	0.664014	18.6945	0.239121
Reading	left medial occipito-temporal sulcus and lingual sulcus	49.4943	20.4614	0.0155998	0.056254	16.1246	0.0391361		8.73853e-05	4.32101e-05	0.0431911	0.190361	17.5876	0.470719
Reading	left medial orbital sulcus	14.9082	5.83468	0.0106428	0.0487115	16.1246	0.177965		0.000128913	0.000167367	0.441189	0.617665	17.9083	0.250556
Reading	left suborbital sulcus	27.1127	12.944	0.0362519	0.105219	16.1246	0.814246		-0.000113766	0.000109271	0.297859	0.530308	17.8582	0.0383198
Reading	left subparietal sulcus	31.4517	15.9507	0.048683	0.128739	16.1246	0.415844		7.25776e-05	6.03013e-05	0.228804	0.439156	17.7632	0.959096
Reading	left inferior temporal sulcus	38.8235	19.3722	0.0451113	0.124843	16.1246	0.966291		4.32691e-05	5.30658e-05	0.414887	0.602093	17.3529	0.00471041
Reading	left superior temporal sulcus	126.117	68.4469	0.0654501	0.144233	16.1246	0.736927		1.16024e-05	1.34719e-05	0.389152	0.583701	17.3326	0.744276
Reading	right inferior occipital gyrus and sulcus	35.8794	24.5121	0.143323	0.27072	16.1246	0.866894		2.36595e-05	4.70273e-05	0.614914	0.748444	18.6786	0.0470774
Reading	right subcentral gyrus and sulci	62.3747	24.2964	0.0102778	0.0487115	16.1246	0.827608		7.20518e-05	3.83611e-05	0.0604004	0.223612	18.2715	0.012497
Reading	right transverse frontopolar gyri and sulci	26.0922	19.9144	0.190178	0.342897	16.1246	0.0895956		7.94666e-05	6.24767e-05	0.203449	0.403507	18.1868	0.282001
Reading	right anterior part of the cingulate gyrus and sulcus	101.33	34.5797	0.0034001	0.028796	16.1246	0.314679		4.08477e-05	2.6231e-05	0.119475	0.323126	18.3951	0.539452
Reading	right middle-anterior part of the cingulate gyrus and sulcus	18.8405	21.1412	0.372877	0.500947	16.1246	0.838053		1.70412e-05	4.67325e-05	0.715384	0.818564	18.2017	0.270285
Reading	right middle-posterior part of the cingulate gyrus and sulcus	43.2496	19.8398	0.0293054	0.0942524	16.1246	0.74989		5.86348e-05	4.44286e-05	0.186973	0.397318	16.3483	0.701656
Reading	right posterior-dorsal part of the cingulate gyrus	31.7747	13.9545	0.0228236	0.0776002	16.1246	0.42805		0.000107874	6.7738e-05	0.111326	0.313209	18.9284	0.196435
Reading	right middle frontal gyrus	234.942	78.3775	0.00273378	0.028796	16.1246	0.498286		4.75847e-06	1.26972e-05	0.707849	0.817806	17.0715	0.581634
Reading	right superior frontal gyrus	198.573	99.5839	0.0461989	0.124947	16.1246	0.6866		-1.79158e-06	9.37447e-06	0.848444	0.909594	17.5913	0.0846837
Reading	right long insular gyrus and central sulcus of the insula	32.2785	9.92028	0.00114579	0.0227249	16.1246	0.262182		7.5792e-05	0.000107063	0.479025	0.655218	16.4017	0.277362
Reading	right short insular gyri	3.08815	13.8165	0.823146	0.859248	16.1246	0.260495		-9.07065e-05	6.70986e-05	0.176484	0.393174	17.0337	0.325379
Reading	right middle occipital gyrus	60.8097	45.3796	0.180295	0.330078	16.1246	0.500779		2.75386e-05	2.02146e-05	0.173157	0.393174	17.0478	0.456884
Reading	right superior occipital gyrus	9.01062	24.8647	0.717077	0.797497	16.1246	0.300436		-3.27989e-06	3.60151e-05	0.927441	0.943294	18.7273	0.0184502
Reading	right lateral occipito-temporal gyrus	96.0005	39.195	0.0143448	0.056254	16.1246	0.441275		-7.18285e-06	2.68967e-05	0.789438	0.869844	17.7143	0.371919
Reading	right orbital gyri	74.4816	38.2505	0.0515617	0.133388	16.1246	0.211866		3.21567e-05	2.38985e-05	0.178504	0.393174	17.4343	0.157015
Reading	right precentral gyrus	43.9713	41.2463	0.286441	0.431475	16.1246	0.315325		3.6873e-05	2.05209e-05	0.0724152	0.235708	18.0146	0.505525
Reading	right precuneus	34.5112	42.7513	0.419555	0.531139	16.1246	0.0197182		2.59799e-05	2.00384e-05	0.194857	0.403507	17.8535	0.0174037
Reading	right gyrus rectus	52.315	13.3926	9.48797e-05	0.0112931	16.1246	0.45701		1.44e-05	6.71255e-05	0.830147	0.898413	16.9673	0.827142
Reading	right lateral aspect of the superior temporal gyrus	40.4105	33.6679	0.230089	0.380285	16.1246	0.0620697		-8.95995e-06	2.73088e-05	0.742851	0.841897	18.588	0.385118
Reading	right planum polare of the superior temporal gyrus	47.6524	16.313	0.00350207	0.028796	16.1246	0.690671		0.00010629	5.45453e-05	0.0513887	0.205653	17.6046	0.327206
Reading	right inferior temporal gyrus	159.441	53.3919	0.00283703	0.028796	16.1246	0.760152		-6.96542e-06	1.695e-05	0.681134	0.798912	18.917	0.802347
Reading	right middle temporal gyrus	101.543	54.7036	0.0634746	0.144233	16.1246	0.223784		6.18645e-05	1.68265e-05	0.000238653	0.0102211	15.781	0.349232
Reading	right temporal pole	63.6281	29.3547	0.030236	0.0946864	16.1246	0.416865		3.17312e-05	3.23929e-05	0.327341	0.555424	17.8483	0.717431
Reading	right superior segment of the circular sulcus of the insula	22.2874	12.8806	0.0836331	0.174602	16.1246	0.61804		7.92695e-05	7.10055e-05	0.264307	0.491446	17.7866	0.758528
Reading	right anterior transverse collateral sulcus	38.4852	14.6038	0.00843064	0.0449564	16.1246	0.0441342		0.000111079	7.19821e-05	0.122852	0.324876	17.6951	0.191875
Reading	right anterior occipital sulcus and preoccipital notch	30.6648	13.7536	0.0258161	0.0853365	16.1246	0.121334		7.17652e-05	6.92887e-05	0.300369	0.530308	18.4695	0.349169
Reading	right lateral occipito-temporal sulcus	29.3792	15.664	0.0607669	0.141837	16.1246	0.780702		0.000177045	6.73645e-05	0.0086091	0.0782916	19.0732	0.235699
Reading	right medial occipito-temporal sulcus and lingual sulcus	23.6052	19.5501	0.227323	0.380285	16.1246	0.593947		4.96407e-05	4.70985e-05	0.291941	0.530308	18.1327	0.441001
Reading	right medial orbital sulcus	20.6919	7.55188	0.00616471	0.0388749	16.1246	0.0888174		2.76382e-05	0.000129081	0.830465	0.898413	17.2079	0.091222
Reading	right suborbital sulcus	21.7314	7.17868	0.00247983	0.028796	16.1246	0.145006		0.000393089	0.000202329	0.0520903	0.205653	18.5984	0.148673
Reading	right subparietal sulcus	16.7817	20.4343	0.41154	0.52964	16.1246	0.179385		0.000137457	4.89707e-05	0.00501963	0.0597335	18.1932	0.00475511
Reading	right inferior temporal sulcus	50.3685	14.5688	0.000549842	0.0218104	16.1246	0.892914		1.96326e-05	6.37825e-05	0.758242	0.851234	17.413	0.062904
Reading	right superior temporal sulcus	215.654	70.8524	0.0023481	0.028796	16.1246	0.182989		5.63116e-05	1.15881e-05	1.21049e-06	0.00014399	17.5066	0.610232
Reading	left-thalamus-proper	71.3846	29.3723	0.0151172	0.056254	16.1246	0.0158786		7.4219e-05	2.84902e-05	0.00921078	0.0782916	16.7813	0.935582
Reading	left-caudate	54.9017	18.7695	0.00345837	0.028796	16.1246	0.241627		7.38919e-05	4.29386e-05	0.0853314	0.267222	16.9375	0.851665
Reading	left-putamen	39.8711	22.224	0.07286	0.157642	16.1246	0.413503		0.000118965	3.25311e-05	0.000257674	0.0102211	16.8248	0.05359
Reading	left-pallidum	-5.79224	9.64984	0.54837	0.659151	16.1246	0.658716		7.65942e-05	9.16174e-05	0.403179	0.592325	17.1215	0.0990006
Reading	left-hippocampus	11.1	14.9466	0.457727	0.567391	16.1246	0.249494		0.000114938	5.11886e-05	0.0247842	0.140444	16.6583	0.561368
Reading	left-amygdala	10.2359	8.51691	0.229479	0.380285	16.1246	0.898284		0.000296928	0.000103941	0.00429693	0.056815	14.6123	0.645752
Reading	right-thalamus-proper	90.8332	26.0346	0.000488807	0.0218104	16.1246	0.037658		0.000101112	2.90875e-05	0.000512744	0.0152541	17.9581	0.800139
Reading	right-caudate	45.3461	18.6643	0.0151497	0.056254	16.1246	0.478403		6.51299e-05	4.11087e-05	0.113176	0.313209	16.5786	0.870216
Reading	right-putamen	36.8394	21.8406	0.091711	0.188166	16.1246	0.191966		6.65622e-05	3.26604e-05	0.0415975	0.190361	16.6681	0.189995
Reading	right-pallidum	8.08742	9.10893	0.374658	0.500947	16.1246	0.491929		0.000140064	9.78248e-05	0.152263	0.387929	17.0408	0.620577
Reading	right-hippocampus	18.5745	15.7435	0.238125	0.388176	16.1246	0.362851		3.89345e-05	4.9574e-05	0.432265	0.612375	17.2053	0.275146
Reading	right-amygdala	9.11606	8.28371	0.271172	0.424599	16.1246	0.890732		0.000216961	9.88202e-05	0.0281693	0.142068	17.6096	0.286185
Notes. β indicates effect coefficients in the Mendelian randomization analyses, se is the standard error of the coefficient, p and FDR-corrected p are significance, the weak IV test provides an estimate of whether the instrumental variables (IVs) are weak, and the Sargan test assesses whether the IVs are overidentified. An effect that survived the FDR correction (FDR-corrected p < 0.05, across ab…
Abbreviation. TVM = watching television shows/ movies; Game = playing video games;

## Sheet: Stable4
Supplementary Table 4. The indirect effect of screen use on children's cognitions
Screen type	Mediator	Cognition	β	se	p
Video	reading	picture vocabulary	-0.62496	0.156074	6.68134e-05
		reading	-0.742474	0.183051	5.37814e-05
SNS		picture vocabulary	-2.41001	0.750787	0.00136975
		reading	-2.86317	0.884413	0.00124604
VC		picture vocabulary	-1.89789	0.60024	0.00161471
		reading	-2.25476	0.707235	0.00147643
Notes: Only the cognitive or behavior outcomes that were found to be significantly influenced by reading times were included in the two-step MR analysis here

## Sheet: Stable5
Supplementary Table 5. The indirect effect of screen use on children's brain volume with reading time as mediator
Screen type	Brain area	β	se	p
Video	left subcentral gyrus and sulci	-7.30963	3.06911	0.0174201
	left middle frontal gyrus	-24.9091	9.50401	0.00890288
	left lateral occipito-temporal gyrus	-10.1392	4.18222	0.0155118
	left orbital gyri	-8.69052	3.88517	0.0255163
	left anterior transverse temporal gyrus	-3.9395	1.4913	0.00837906
	left planum temporale	-6.12867	2.74788	0.0259471
	left temporal pole	-7.55353	3.34115	0.0239888
	left superior segment of the circular sulcus of the insula	-3.56953	1.56623	0.0228734
	left anterior occipital sulcus and preoccipital notch	-4.13374	1.78793	0.020979
	left medial orbital sulcus	-1.47632	0.672923	0.0284728
	right subcentral gyrus and sulci	-6.1768	2.80518	0.0278982
	right anterior part of the cingulate gyrus and sulcus	-10.0345	4.1289	0.0152613
	right middle frontal gyrus	-23.2657	9.41898	0.0136741
	right long insular gyrus and central sulcus of the insula	-3.19645	1.22247	0.00906373
	right gyrus rectus	-5.18061	1.76428	0.00339666
	right planum polare of the superior temporal gyrus	-4.71888	1.9461	0.0154935
	right inferior temporal gyrus	-15.789	6.40935	0.0139289
	right medial orbital sulcus	-2.04906	0.885723	0.0209008
	right suborbital sulcus	-2.152	0.865168	0.0130308
	right inferior temporal sulcus	-4.98785	1.83239	0.00660082
	right superior temporal sulcus	-21.3556	8.55271	0.012687
	left-caudate	-5.43676	2.23999	0.0153943
SNS	left subcentral gyrus and sulci	-28.1878	13.0609	0.0311508
	left middle frontal gyrus	-96.0557	41.0889	0.0195964
	left lateral occipito-temporal gyrus	-39.0994	17.8467	0.0286931
	left orbital gyri	-33.5129	16.3848	0.0410803
	left anterior transverse temporal gyrus	-15.1917	6.45652	0.018819
	left planum temporale	-23.6337	11.5839	0.0415913
	left temporal pole	-29.1283	14.1112	0.0392563
	left superior segment of the circular sulcus of the insula	-13.765	6.62236	0.0379117
	left anterior occipital sulcus and preoccipital notch	-15.9407	7.5753	0.0356009
	left medial orbital sulcus	-5.69306	2.83051	0.0445598
	right subcentral gyrus and sulci	-23.8193	11.8051	0.0438883
	right anterior part of the cingulate gyrus and sulcus	-38.6955	17.6259	0.0283661
	right middle frontal gyrus	-89.7185	40.3132	0.0262675
	right long insular gyrus and central sulcus of the insula	-12.3263	5.28292	0.0198329
	right gyrus rectus	-19.9778	7.79929	0.0105683
	right planum polare of the superior temporal gyrus	-18.1972	8.30478	0.0286692
	right inferior temporal gyrus	-60.8864	27.42	0.0266078
	right medial orbital sulcus	-7.90171	3.75305	0.0355047
	right suborbital sulcus	-8.29868	3.70712	0.0254026
	right inferior temporal sulcus	-19.2344	7.97743	0.0160836
	right superior temporal sulcus	-82.3527	36.6702	0.0249367
	left-caudate	-20.9656	9.56039	0.0285398
VC	left subcentral gyrus and sulci	-22.198	10.3641	0.032449
	left middle frontal gyrus	-75.6442	32.64	0.020676
	left lateral occipito-temporal gyrus	-30.7909	14.1644	0.0299526
	left orbital gyri	-26.3915	12.9934	0.0425049
	left anterior transverse temporal gyrus	-11.9635	5.12939	0.0198798
	left planum temporale	-18.6116	9.18602	0.0430213
	left temporal pole	-22.9387	11.1916	0.0406607
	left superior segment of the circular sulcus of the insula	-10.84	5.25261	0.0393005
	left anterior occipital sulcus and preoccipital notch	-12.5534	6.00931	0.0369611
	left medial orbital sulcus	-4.48331	2.24423	0.0460197
	right subcentral gyrus and sulci	-18.7578	9.36028	0.0453417
	right anterior part of the cingulate gyrus and sulcus	-30.4728	13.9896	0.0296202
	right middle frontal gyrus	-70.6536	32.0019	0.0274852
	right long insular gyrus and central sulcus of the insula	-9.70702	4.1965	0.0209181
	right gyrus rectus	-15.7325	6.2046	0.011376
	right planum polare of the superior temporal gyrus	-14.3304	6.59127	0.0299283
	right inferior temporal gyrus	-47.9482	21.7663	0.0278316
	right medial orbital sulcus	-6.22262	2.97723	0.0368636
	right suborbital sulcus	-6.53523	2.94306	0.0266045
	right inferior temporal sulcus	-15.1472	6.34002	0.0170724
	right superior temporal sulcus	-64.853	29.1135	0.0261298
	left-caudate	-16.5104	7.5879	0.0297968
Notes: Only the brain regions that were found to be significantly influenced by reading times were included in the two-step MR analysis here
